**1 Ovarian carcinosarcoma genomics and pre-clinical models highlight the N-MYC  
2 pathway as a key driver and susceptibility to EMT-targeting therapy**

3 Gwo Yaw Ho<sup>1,2,3,4^</sup>, Elizabeth L. Kyran<sup>1,2,5^</sup>, Justin Bedo<sup>1,6^</sup>, Matthew J. Wakefield<sup>1,7^</sup>, Darren  
4 P. Ennis<sup>8,9</sup>, Hasan B. Mirza<sup>8</sup>, Elizabeth Lieschke<sup>1,2</sup>, Cassandra J. Vandenberg<sup>1,2</sup>, Olga  
5 Kondrashova<sup>1</sup>, Rosie Upstill-Goddard<sup>9</sup>, Ulla-Maja Bailey<sup>9</sup>, Suzanne. Dowson<sup>9</sup>, Patricia  
6 Roxburgh<sup>9,10</sup>, Rosalind M. Glasspool<sup>9,10</sup>, Gareth Bryson<sup>11</sup>, Andrew V. Biankin<sup>9</sup>, Susanna L.  
7 Cooke<sup>9</sup>, on behalf of the Scottish Genomes Partnership, Gayanie Ratnayake<sup>3</sup>, Orla McNally<sup>3,7</sup>,  
8 Nadia Traficante<sup>12,13</sup>, Australian Ovarian Cancer Study<sup>12,14</sup>, Anna DeFazio<sup>14,15,16</sup>, John  
9 Weroha<sup>17</sup>, David D. Bowtell<sup>12,13</sup>, Iain A. McNeish<sup>8,9,10#</sup>, Anthony T. Papenfuss<sup>1,2,12,18#</sup>, Clare  
10 L. Scott<sup>1,2,3,7,13#</sup>, Holly E. Barker<sup>1,2#\*</sup>

11 <sup>1</sup>The Walter and Eliza Hall Institute of Medical Research, Parkville, Victoria, 3052, Australia.

12 <sup>2</sup>Department of Medical Biology, University of Melbourne, Parkville, Victoria, 3010,  
13 Australia.

14 <sup>3</sup>The Royal Women's Hospital, Parkville, Victoria, 3052, Australia.

15 <sup>4</sup>School of Clinical Sciences, Monash Health, Monash University, Clayton, Victoria, 3800,  
16 Australia.

17 <sup>5</sup>Cancer Research UK Cambridge Institute, Cambridge CB2 0RE, UK.

18 <sup>6</sup>Department of Computing and Information Systems, the University of Melbourne, Parkville,  
19 Victoria, 3010, Australia.

20 <sup>7</sup>Department of Obstetrics and Gynaecology, University of Melbourne, Parkville, Victoria  
21 3010, Australia.

22 <sup>8</sup>Division of Cancer and Ovarian Cancer Action Research Centre, Department of Surgery and  
23 Cancer, Imperial College London, London W12 0NN, UK.

24 <sup>9</sup>Institute of Cancer Sciences, Wolfson Wohl Cancer Research Centre, University of Glasgow,  
25 Glasgow G61 1QH, UK.

26 <sup>10</sup>Beatson West of Scotland Cancer Centre, Glasgow G12 0NN, UK.

27 <sup>11</sup>Department of Pathology, Queen Elizabeth University Hospital, Glasgow G51 4TF, UK.

28 <sup>12</sup>Research Division, Peter MacCallum Cancer Centre, 305 Grattan Street, Melbourne,  
29 Victoria, 3000, Australia.

30 <sup>13</sup>Sir Peter MacCallum Cancer Centre Department of Oncology, University of Melbourne,  
31 Parkville, Victoria, 3010, Australia.

32 <sup>14</sup>Centre for Cancer Research, The Westmead Institute for Medical Research, Sydney, NSW  
33 2145, Australia.

34 <sup>15</sup>The University of Sydney, Sydney, NSW 2145, Australia.

35 <sup>16</sup>Department of Gynaecological Oncology, Westmead Hospital, Sydney, NSW, 2145,  
36 Australia.

37 <sup>17</sup>Department of Oncology, Mayo Clinic, Rochester, Minnesota, US.

38 <sup>18</sup>Sir Peter MacCallum Department of Oncology, University of Melbourne, Parkville, Victoria,  
39 3010, Australia.

40

41 ^ # authors contributed equally to work

42 \* Corresponding author Dr Holly Barker

43 Contact details [barker.h@wehi.edu.au](mailto:barker.h@wehi.edu.au)

44

## 45 **Abstract**

46

47 Ovarian carcinosarcoma (OCS) is an aggressive and rare tumour type with limited treatment  
48 options. OCS is hypothesised to develop via the combination theory from a single progenitor,  
49 resulting in carcinomatous and sarcomatous components, or alternatively via the conversion  
50 theory, with the sarcomatous component developing from the carcinomatous component  
51 through epithelial-to-mesenchymal transition (EMT). We show OCS from 18 women to be  
52 monoclonal through analysis of DNA variants from isolated carcinoma and sarcoma  
53 components. RNA sequencing indicated the carcinoma components were more mesenchymal  
54 when compared with pure ovarian carcinomas, supporting the conversion theory. We used pre-  
55 clinical OCS models to test the efficacy of microtubule-targeting drugs, including eribulin,  
56 which has been shown to reverse EMT characteristics. We demonstrated that microtubule  
57 inhibitors, vinorelbine and eribulin, were more effective than standard-of-care platinum-based  
58 chemotherapy. Eribulin reduced mesenchymal characteristics, N-MYC expression and  
59 cholesterol biosynthesis. Finally, eribulin induced a strong immune response, supporting  
60 immunotherapy combinations in the clinic.

61

## 62 **Introduction**

63 Ovarian carcinosarcoma (OCS), also known as malignant mixed Müllerian tumour, is a  
64 heterogeneous cancer with poor prognosis<sup>1</sup>, accounting for 1-4% of ovarian malignancies<sup>2,3</sup>.  
65 These tumours contain both epithelial (carcinoma) and mesenchymal (sarcoma) components<sup>3</sup>.

66 Molecular analysis suggests that most OCS are monoclonal<sup>4-9</sup>, with two theories for OCS  
67 histogenesis: the combination theory, where a single stem cell differentiates early to form the  
68 two components; and the conversion theory, where the carcinoma undergoes epithelial-to-  
69 mesenchymal transition (EMT) to form the sarcomatous component<sup>10</sup>.

70

71 *TP53* mutations and loss of heterozygosity (LOH) of 17p, and consequent chromosomal  
72 instability, are common in OCS<sup>7,8,11-14</sup>. Mutations in *PIK3CA*, *PTEN*, *KRAS*, *FBXW7*,  
73 *CTNNB1*, and *RBI* are observed frequently<sup>5,8,9,13,15-17</sup>, whilst mutations in *ARID1A*, *ARID1B*,  
74 *KMT2D*, *BAZ1A*, *BRCA1*, *BRCA2*, and *RAD51C* have also been reported<sup>8,15-19</sup>. One study also  
75 identified recurrent mutations in the genes encoding histones H2A and H2B (*HIST1H2AB/C*,  
76 *HIST1H2BB/G/J*) that play a role in EMT<sup>9</sup>. Only one study has analysed gene expression in  
77 the separate components, finding a strong positive correlation of EMT score with sarcoma  
78 content as well as methylation of the EMT-suppressing miRNAs  
79 miR-141/200a/200b/200c/429<sup>8</sup>.

80

81 EMT can be induced through aberrant expression of the high-mobility-group AT-hook protein  
82 2 (HMGA2) and subsequent activation of the TGF $\beta$  signalling pathway<sup>20</sup>. HMGA2 binds  
83 preferentially to AT-rich DNA sequences in a histone-independent manner<sup>21-24</sup>. HMGA2 is not  
84 expressed in most adult tissues<sup>25,26</sup>, but high expression has been observed in many cancers and  
85 is correlated with metastasis and chemotherapy resistance<sup>27-31</sup>. HMGA2 expression is thought  
86 to be largely controlled by the microRNA *let-7*<sup>32-35</sup>. Other downstream target genes of *let-7*  
87 include *MYCN* and *LIN28B*, whilst *LIN28B* inhibits maturation of *let-7*<sup>36</sup>, reinforcing both low  
88 and high expression states and acting as a bistable switch. Up-regulation of the  
89 N-MYC/*LIN28B* pathway has been observed in the aggressive C5 subset of ovarian or  
90 fallopian tube high-grade serous carcinoma (HGSC) and in other aggressive cancer subtypes,  
91 and is indicative of poor prognosis<sup>36-38</sup>. Furthermore, high HMGA2 expression has been  
92 observed in 60% of OCS cases<sup>39</sup>. We hypothesised that up-regulation of the N-MYC/*LIN28B*  
93 pathway and subsequent expression of HMGA2 may be a key driver of OCS, and drugs that  
94 target EMT may be effective.

95

96 Eribulin is a microtubule-targeting drug that binds to the plus ( $\beta$  tubulin exposed) end of  
97 microtubules resulting in mitotic blockade<sup>40,41</sup>. *In vitro*, *in vivo* and human studies show that  
98 eribulin can reverse EMT, leading to favourable intra-tumoral vascular remodelling, reduced  
99 cell invasion, increased cell differentiation<sup>42-46</sup> and modulation of the tumour-immune

100 microenvironment<sup>47</sup>. Eribulin has completed Phase III trials for metastatic breast cancer, soft-  
101 tissue sarcoma and non-small cell lung cancer (NSCLC). It has Therapeutic Goods  
102 Administration (TGA) approval for treatment of advanced breast cancer and liposarcoma<sup>47,48</sup>.  
103 We hypothesised that eribulin may be effective against OCS tumours due to its role in reversal  
104 of EMT characteristics.

105

106 Here we present mutation, copy number and gene expression analyses of separate components  
107 from an OCS cohort. We have used a unique genetically engineered mouse model (GEMM)  
108 and patient-derived xenograft (PDX) models of OCS to assess the efficacy of a range of  
109 microtubule-targeting drugs and to determine the mechanism of action of eribulin, a drug with  
110 significant activity in these models.

111

## 112 **Results**

113

### 114 **Mutation and copy number profile of OCS was similar to HGSC**

115 We identified eighteen women diagnosed with OCS, seventeen with high-grade serous  
116 carcinoma (HGSC) and one with grade 2 endometrioid histology in the carcinoma component.  
117 Twelve associated metastatic samples were also available. Full clinical details are shown in  
118 Supplementary Table S1 and Supplementary Figure S1. Targeted sequencing of 377 genes in  
119 macro-dissected carcinoma and sarcoma components as well as metastases was performed  
120 (Supplementary Tables S2-S7; Supplementary Figure S2).

121

122 Overall, OCS samples had genomic profiles similar to HGSC, with near-ubiquitous *TP53*  
123 mutation (17/18 cases, including 17/17 with HGSC pathology), *CCNE1* amplification (4/18  
124 cases), *BRCA2* loss or mutation (4/18 cases), *KRAS* mutation and amplification (4/18 cases),  
125 *PIK3CA* mutation and amplification (4/18 cases), *NF1* or *CDKN2A* mutation or disruption by  
126 rearrangement (2/18 cases each), *RBI* deletion (2/18 cases), *PTEN* mutation (2/18 cases) and  
127 *MYC* or *MYCN* amplification (1/18 and 2/18 cases, respectively) (Figure 1a). Overall  
128 mutational burden was low (mean 1.2, median 0.87 mutations/MB sequenced), which did not  
129 differ between carcinoma and sarcoma (Figure 1b, Supplementary Table S8). However, as with  
130 HGSC, the genomes were structurally unstable with an average of 3.3 high-level gains and 1.4  
131 likely homozygous deletions called per sample (Supplementary Figure S3).

132

133 Only WW00163 lacked a *TP53* mutation. It had mutations in *KRAS* and *ERBB2* (Figure 1a)  
134 together with a subclonal mutation of *KMT2C* and lacked the genomic chaos typical of HGSC  
135 (Supplementary Figure S4), in keeping with an origin of endometrioid carcinoma.

136

137 Based on point mutation profiles, there were no consistent differences between the sarcoma  
138 and carcinoma components. In all cases, the two components shared at least one point mutation,  
139 demonstrating a shared clonal origin. Half of carcinoma-sarcoma pairs (8/16) shared all point  
140 mutations while the others gained additional mutation(s) in one or both components. On  
141 average, carcinoma-sarcoma pairs differed by only a single mutation (range 0-7). These data  
142 indicate that these tumours are monoclonal, which supports both the conversion and  
143 combination theories of carcinogenesis.

144

145 By contrast, there were more copy number changes between the carcinoma and sarcoma  
146 components, with an average of 10.6 genes having a different copy number state between the  
147 two (range 0-36) (Supplementary Figures S3 and S4; Supplementary Table S6). The most  
148 commonly different genes were *FGF3* and *MDM2* (Supplementary Table S7). However, these  
149 differences did not appear to be focal or high level, perhaps suggesting that these genes are not  
150 specific targets of alteration between carcinomas and sarcomas. Instead these chromosomal  
151 differences may arise due to ongoing chromosomal instability. Case WW00169 had neither  
152 mutation nor copy number differences between the carcinoma and sarcoma components.

153

154 Interestingly, in some cases metastases showed substantial genomic divergence from their  
155 corresponding primary, indicative of an early seeding to the metastatic sites (Figure 1a). In  
156 addition to two cases (WW00154, WW00158) where the metastasis either gained three  
157 mutations or lost four, a third case (WW00157) diverged in several likely driver copy number  
158 events including loss of *BRCA2* between the carcinoma and its corresponding metastasis  
159 (Supplementary Tables S4, S6 and S7).

160

### 161 **OCS had EMT-like and N-MYC pathway gene expression patterns**

162 We next undertook RNA sequencing (RNAseq) on isolated carcinoma (n=13) and sarcoma  
163 (n=9, 7 paired with carcinoma) components (Supplementary Figure S5; Supplementary Tables  
164 S9-S12).

165

166 Using an EMT expression signature derived from uterine carcinosarcoma<sup>49</sup>, we found a highly  
167 significant enrichment of EMT in carcinosarcomas, compared with the TCGA cohort of  
168 ovarian HGSC (TCGA-OV; n=379)<sup>50</sup>. This enrichment was predominantly driven by the  
169 sarcoma component ( $p<0.0001$ ; Figure 1c) and was confirmed using other reported EMT  
170 signatures<sup>51-53</sup> (Supplementary Figure S6). Interestingly, the carcinoma components also had  
171 significantly higher EMT scores than the TCGA-OV cohort, suggesting that the OCS  
172 carcinoma component was either predisposed to undergo sarcomatous transformation or  
173 already transitioning to sarcoma ( $p<0.0001$ ; Figure 1c). Together, these data support the  
174 conversion theory of OCS development.

175

176 To study the N-MYC/LIN28B pathway specifically, we analysed *MYCN*, *LIN28B* and *HMGA2*  
177 expression in the same dataset. *LIN28B* and *HMGA2* were significantly up-regulated compared  
178 to the TCGA-OV cohort ( $p<0.0001$  for both; Figure 1d).

179

### 180 **p53 inhibition and up-regulation of the N-MYC/LIN28B pathway in fallopian tube** 181 **secretory epithelial cells gave rise to OCS**

182 We established an OCS GEMM by directing both p53 inhibition and N-MYC/LIN28B pathway  
183 up-regulation to the fallopian tube secretory epithelial cell (FTSEC) via the PAX8 promoter<sup>54-</sup>  
184 <sup>57</sup>. The resulting founder tumour (T0) and stable cell line derived from a first passage tumour  
185 (T1) (OCS GEMM cells) were used for subsequent experiments (Figure 2a; Supplementary  
186 Tables S13 and S14).

187

188 IHC analysis revealed high p53 expression, in keeping with SV40 TAg-mediated  
189 accumulation<sup>58</sup> (Figure 2b). Tumours expressed cytokeratin (pan-CK) in approximately 5%  
190 and vimentin in approximately 95% of the regions analysed, indicating a predominantly  
191 sarcomatous phenotype (Figure 2b). RNA sequencing confirmed up-regulation of *Lin28b* and  
192 *Mycn* in the tumours and up-regulation of *Lin28b* and *Hmga2* in the cell line, relative to control  
193 fallopian tubes (Figure 2c; Supplementary Table S15), whilst quantitative RT-PCR confirmed  
194 elevated expression of *Lin28b* in both the tumour and cell line (Supplementary Figure S7).

195

### 196 **GEMM tumours were resistant to current standard-of-care treatments but responded to** 197 **the microtubule inhibitors vinorelbine and eribulin**

198 We assessed the *in vivo* response of GEMM tumours to standard-of-care HGSC therapies;  
199 cisplatin, pegylated liposomal doxorubicin (PLD) and paclitaxel. Overall, the tumours were



200 refractory to all three treatments, as the time to progressive disease (PD) was the same as for  
201 vehicle treatment. PLD and cisplatin failed to demonstrate any meaningful response in the  
202 GEMM tumours (Figure 3a), although paclitaxel demonstrated modest responses with an  
203 increase in median time-to-harvest (TTH) from 15 to 36 days compared to vehicle treatment  
204 (Table 1,  $p=0.0101$ , respectively). By contrast, significant tumour regression was observed in  
205 all tumours treated with the microtubule inhibitor vinorelbine leading to improvement of  
206 median TTH (15 days (vehicle) vs 81 days (vinorelbine); Figure 3a, Table 1;  $p<0.0001$ ).  
207 Eribulin also resulted in significant tumour regression in all tumours leading to improvement  
208 of median TTH (15 days (vehicle) vs 46 days (eribulin); Figure 3a, Table 1;  $p<0.0001$ ).  
209 Expression of Ki67 in the tumours was reduced one week after mice received a single dose of  
210 eribulin (Figure 3b).

211

### 212 **Eribulin treatment reduced adhesion, invasion and branching of the OCS GEMM cell** 213 **line**

214 *In vitro* functional assays showed eribulin reduced both adhesion to collagen matrices (Figure  
215 3c;  $p=0.024$ ) and invasion through extracellular matrices of OCS GEMM cells (Figure 3c;  
216  $p=0.0042$ ), compared to DMSO, and reduced branch formation in 3D collagen growth assays  
217 (Figure 3d). Western Blot analysis determined a reduction in expression of the mesenchymal  
218 markers ZEB1, N-cadherin, vimentin and HMGA2 in OCS GEMM cells exposed to eribulin  
219 (Figure 3e).

220

### 221 **A cohort of OCS PDX models with N-MYC/LIN28B pathway up-regulation recapitulated** 222 **the biphasic and heterogeneous nature of OCS**

223 We next expanded and characterised six PDX models of OCS with varying degrees of  
224 carcinoma and sarcoma, all harbouring loss or mutation of TP53 (Figure 4a; Supplementary  
225 Table S16). The heterogeneous characteristics of the PDX cohort resembled the human OCS  
226 tumour landscape. Furthermore, all PDX models expressed HMGA2, suggesting the N-  
227 MYC/LIN28B pathway was up-regulated. Over time, a purely sarcomatous lineage  
228 (PH003sarc) arose from the original mixed PH003 model (called PH003mixed). RNAseq data  
229 revealed that all PDX had higher HMGA2 expression and EMT scores than the TCGA-OV  
230 cohort (Figures 4b and 4c). The most sarcomatous PDX models (PH003sarc and PH592) had  
231 higher EMT scores than models containing regions of pure carcinoma (PH419 and  
232 PH003mixed). By Western Blot, expression of vimentin was highest in PH142, PH003mixed

233 and PH003sarc. PH419 exhibited the lowest expression of vimentin and PH006 and PH592  
234 had intermediate expression (Figure 4d).

235

### 236 **Platinum based chemotherapy was ineffective in OCS PDX**

237 *In vivo*, four of six PDX were refractory to cisplatin as based on our previously published  
238 criteria<sup>59</sup>, failing to achieve any meaningful tumour response and developing progressive  
239 disease (PD) whilst on cisplatin therapy (D1-18) (Figure 5a and Supplementary Figure S8).  
240 Initial tumour regression was observed in PH142 and SFRC01040 but PD occurred by day 42  
241 and day 60 respectively, defining both as cisplatin resistant PDX<sup>59</sup> (Table 2).

242

### 243 **Microtubule-targeting agents, such as paclitaxel, vinorelbine and eribulin, were effective 244 in OCS**

245 Microtubule-targeting agents induced tumour regression and showed an improvement of  
246 median TTH in most OCS PDX models. Three PDX (SFRC01040, PH419 and PH006) were  
247 classified as sensitive to paclitaxel according to the same criteria used for cisplatin<sup>59</sup>, two were  
248 resistant (PH142 and PH592) and one was refractory (PH003) (Figure 5a and Supplementary  
249 Figure S8). Indeed, all models displayed an improvement in median TTH compared with  
250 vehicle, except for PH003, with four models also displaying an improvement in median TTH  
251 compared with cisplatin (Table 2).

252

253 Three of six OCS PDX (SFRC01040, PH142 and PH006) were sensitive to vinorelbine, two  
254 resistant (PH419 and PH592) and one refractory (PH003) (Figure 5a and Supplementary Figure  
255 S8). Interestingly, the more sarcomatous PDX models, PH003 and PH592, were less sensitive  
256 to vinorelbine than were the more carcinomatous models. Significant improvements in median  
257 TTH compared with vehicle were observed for all models except PH003, and in four models  
258 compared with cisplatin (Table 2).

259

260 Lastly, three of six PDX models (SFRC01040, PH419 and PH006) were sensitive to eribulin  
261 treatment, two were resistant (PH142 and PH592) and one was refractory (PH003) (Figure 5a  
262 and Supplementary Figure S8). Interestingly, near complete responses to eribulin were  
263 observed in three PDX (SFRC01040, PH419 and PH006). Significant improvements in median  
264 TTH compared to vehicle and cisplatin were observed for five models and four models,  
265 respectively (Table 2). Eribulin treatment of PH592, which was predominantly sarcomatous,  
266 resulted in significant tumour stabilisation to 40 days followed by marked tumour regression



267 between days 60 to 80 before rapid disease progression. Even for the most aggressive model,  
268 PH003, eribulin treatment resulted in a statistically significant improvement in median TTH,  
269 albeit of short duration (8 days (vehicle) vs 25 days (eribulin) ( $p=0.0003$ ) and 15 days  
270 (cisplatin) vs 25 days (eribulin) ( $p=0.0044$ )) (Table 2).

271

272 It was noted that one lineage of the sarcomatous PDX PH592 was markedly more sensitive to  
273 cisplatin treatment, denoted PH592-B, compared with the more cisplatin resistant, PH592-A  
274 lineage (median TTH of 15 days (PH592-A) vs 71 days (PH592-B);  $p<0.0001$ ) and similarly,  
275 was more sensitive to eribulin (92 days (PH592-A) vs 102 days (PH592-B);  $p=0.0240$ )  
276 (Supplementary Figure S9 and Supplementary Table S17).

277

### 278 ***In vivo* eribulin treatment reduced the expression of mesenchymal markers, including** 279 **HMGA2, in OCS PDX tumours**

280 PDX tumours were harvested one week after mice received a single dose of eribulin (or DPBS  
281 vehicle control) and expression of EMT markers was assessed by western blotting and IHC.  
282 Eribulin reduced expression of the mesenchymal marker HMGA2 as well as ZEB1 and N-  
283 cadherin in most models (Figures 5b-d; Supplementary Figure S10).

284

### 285 **Reduced cholesterol biosynthesis and increased immune activation was implicated in the** 286 **response of a subset of OCS to eribulin**

287 RNAseq analysis of PDX tumours harvested one week after a single dose of eribulin  
288 (Supplementary Table S15) indicated significant down-regulation of genes related to the GO  
289 terms protein targeting to membrane, translational initiation, and regulation of cholesterol  
290 biosynthesis, and up-regulation of genes related to the GO term immune activation (Figure 5e;  
291 Supplementary Tables S18-S21). Interestingly, significantly down-regulated genes included  
292 eight genes involved in the mevalonate (MVA) pathway, which plays a key role in cholesterol  
293 biosynthesis: *SREBF2*, *HMGCR*, *HMGCS1*, *MVK*, *LDLR*, *INSIG1*, *IDII*, *FDFT1*. Expression  
294 of hydroxymethylglutaryl-CoA synthase (HMGCS1), a key enzyme in the MVA pathway, was  
295 assessed by Western Blot analysis and found to be reduced in PH419, PH142 and PH592-B  
296 following a single dose of eribulin (Figures 5f and 5g). In neuroblastoma, which is commonly  
297 driven by *MYCN* amplification, there is also increased activation of the MVA pathway and  
298 apparent reliance on this pathway for survival<sup>71</sup>. We hypothesise that N-MYC is a key driver  
299 of OCS, implicating the MVA pathway in OCS cell survival and drug resistance. Notably, in  
300 three of the PDX models where there was no change in HMGCS1 expression, PH003mixed,

301 PH003sarc and PH592-A, RNAseq showed these models had low expression of *MYCN* with  
302 maintained levels of *LIN28B* (Figure 4b), and expression of N-MYC was almost undetectable  
303 by western blot (Figures 5f and 5g). These tumours also had the poorest relative response to  
304 eribulin *in vivo* (Figure 5b).

305

## 306 **Discussion**

307 OCS is a rare, heterogeneous and clinically aggressive cancer, with poorer overall survival than  
308 HGSC despite a similar mutation and copy number profile<sup>60,61</sup>. Nearly all patients with  
309 metastatic OCS, despite initial response to standard-of-care platinum-based chemotherapy, will  
310 succumb to their cancer due to early relapse of disease<sup>62</sup>. There is no effective second-line  
311 therapy available owing to its multi-drug resistant behaviour<sup>62</sup>. Additionally, the biphasic  
312 nature of OCS and a poor understanding of how these tumours develop has hindered progress  
313 in the development of effective treatment options.

314

315 There have been few previous molecular studies of OCS tumours where the carcinomatous and  
316 sarcomatous components have been micro- or macro-dissected<sup>4,5,7</sup>. Two recent studies  
317 performed whole exome sequencing on separated components of OCS tumours, but on no more  
318 than four tumours each<sup>8,9</sup>. Here, we analysed 377 genes (for mutations, copy number, or both)  
319 in 18 OCS tumours where the carcinomatous and sarcomatous components were analysed  
320 independently along with associated metastases, where available. We found mutations  
321 commonly identified in OCS, with the initial or truncal mutation likely to occur in *TP53*. In  
322 nearly all of the cases, the same *TP53* mutation was identified in all sites available; carcinoma,  
323 sarcoma and metastasis. Independent sites then developed additional mutations in most cases.  
324 Through this we definitively determined that OCS tumours in our cohort were monoclonal.  
325 Furthermore, we carried out RNAseq analysis, which has not previously been achieved for the  
326 independent components in OCS. The carcinomatous component was found to have a  
327 significantly higher EMT score than conventional HGSC, indicating these tumours may have  
328 been primed to undergo sarcomatous transformation early in carcinogenesis. Together, these  
329 data support the conversion theory for OCS histogenesis and highlight the basis of the  
330 aggressive behaviour of tumours that look, at a genomic level, indistinguishable from routine  
331 HGSC but behave like the very worst prognostic outliers. Future studies, utilising high-  
332 resolution single cell sequencing approaches, are required to prove this definitively.  
333 Nevertheless, this study, in keeping with existing published evidence<sup>8,9</sup>, further emphasises the  
334 potential key role of EMT in OCS tumorigenesis and biological behaviour. This study also

335 highlights the potential downfall of treating women with OCS in the same way as HGSC (with  
336 the exception of *BRCA1/2*-mutant OCS cases for whom PARP inhibitor therapy is  
337 reasonable<sup>63</sup>), as we have shown that despite the genomic similarity, OCS are phenotypically  
338 distinct, particularly with regard to drug responses and mesenchymal characteristics.

339

340 Similarities between OCS and the C5 molecular subtype of HGSC, as defined by Tothill *et*  
341 *al*<sup>38</sup>, include the poor clinical outcome and link to drug resistance, as well as deregulation of  
342 the *let-7* pathway<sup>36</sup>, which we have called the N-MYC/LIN28B pathway. We confirmed that  
343 *LIN28B* and *HMGA2* were significantly up-regulated in our cohort of 18 OCS tumours  
344 compared to HGSC. This suggested that the N-MYC pathway is important in the development  
345 and maintenance of OCS. Using this knowledge, we developed a GEMM of OCS by  
346 overexpressing *Lin28b* and inhibiting p53 in PAX8<sup>+</sup> FTSECs. While the OCS GEMM tumours  
347 exhibited high expression of *Lin28b* and *Mycn*, the derived cell line displayed high expression  
348 of *Lin28b* and *Hmga2*, indicating that we had generated two closely related pre-clinical models  
349 of OCS with different characteristics. This demonstrates the complexity of the N-MYC  
350 pathway, as was also indicated by the RNAseq data from our patient samples. Observed  
351 expression of this pathway depends on multiple feedback loops and influences from outside  
352 the pathway, such as transcription factors, and occurs at the level of transcription and  
353 translation, frequently resulting in complex relationships<sup>64</sup>.

354

355 These models were used to compare the current standard-of-care treatments for OCS with novel  
356 treatments, including the unique microtubule-targeting drug, eribulin, that has been shown to  
357 reverse EMT<sup>42-46</sup>, and has demonstrated improved efficacy against metastatic breast cancer,  
358 soft-tissue sarcoma and ovarian cancer<sup>48,65,66</sup>. While the GEMM tumours were refractory to  
359 cisplatin, paclitaxel and PLD *in vivo*, they were responsive to vinorelbine and eribulin. Disease  
360 stabilisation was achieved with both vinorelbine and eribulin, suggesting a longer progression  
361 free survival may be achieved with these drugs in patients. Furthermore, after just a single dose  
362 of eribulin, a notable decrease in tumour cell proliferation was observed. To test the mechanism  
363 of action of eribulin, we used the GEMM cell line and observed significantly reduced adhesion  
364 and invasion following eribulin treatment, which corresponded with an inability of these cells  
365 to branch out in 3D matrix. Finally, an impressive reduction in expression of the mesenchymal  
366 markers ZEB1, N-cadherin, and Vimentin was observed in cells exposed to eribulin while  
367 growing on collagen, as well as in HMGA2. These results are consistent with a previous report

368 where eribulin reversed the process of EMT, thus reducing the mesenchymal characteristics of  
369 breast cancer cells<sup>44</sup>.

370

371 A cohort of molecularly annotated OCS PDX models, closely resembling human OCS, were  
372 characterised for novel drug efficacy. We obtained six PDX models of OCS with a range of  
373 carcinoma and sarcoma characteristics. RNAseq analysis of these tumours indicated all OCS  
374 had higher EMT scores than HGSC, with the most carcinomatous model PH419 having the  
375 lowest EMT score and the most sarcomatous model PH003sarc having the highest EMT score.  
376 At the protein level, PH003sarc also had the highest expression of the mesenchymal markers  
377 N-cadherin and Vimentin. Interestingly, the two models containing mixed cells, PH142 and  
378 PH006 also had high expression of N-cadherin, Vimentin and ZEB1. This matched their high  
379 EMT scores obtained from the RNAseq data and indicated that pathology alone was  
380 insufficient to determine the level of sarcomatous transformation occurring in each OCS model.

381

382 Anti-microtubule agents, as a class of drug, were more effective than platinum-based  
383 chemotherapy in our diverse cohort of OCS PDX models. Interestingly, the proportion of  
384 carcinoma and sarcoma did not appear to correlate with anti-microtubule drug sensitivity.  
385 Whereas for cisplatin, the more carcinomatous PDX had some initial response, while the most  
386 sarcomatous PDX were completely refractory. Indeed, impressive responses were observed for  
387 almost all PDX to the microtubule-targeting drugs, paclitaxel, vinorelbine and eribulin. PDX  
388 PH003 was the one exception where tumours remained refractory to all treatment regimens  
389 tested. This drug-refractory PDX was later found to lack N-MYC expression, representing a  
390 particularly aggressive subtype of OCS, corresponding to rapidly progressive disease in the  
391 patient<sup>67</sup>. Possibly as a consequence of lacking N-MYC, PH003 tumours also exhibited the  
392 lowest expression of HMGA2. Interestingly, PH952-A, the more drug-resistant lineage of  
393 PH592, also lacked expression of N-MYC, whereas it was expressed in the more drug sensitive  
394 lineage, PH592-B. Eribulin is known to reverse EMT characteristics, and indeed we observed  
395 a decrease in N-cadherin and ZEB1 protein expression in most models following a single dose  
396 of eribulin. Reduced ZEB1 and N-cadherin expression was not displayed in all of our models  
397 by IHC, which could be explained by the region of the tumour analysed. Importantly, after a  
398 single dose of eribulin, a decrease in the expression of HMGA2 was observed in PH419,  
399 PH142, PH003sarc, PH592-A and PH592-B tumours. We hypothesised that eribulin interferes  
400 with the N-MYC pathway, leading to a reduction in the mesenchymal characteristics of OCS  
401 tumours, including down-regulation of HMGA2.

402

403 To better understand the mechanism of action of eribulin in our PDX models, we carried out  
404 RNAseq analysis after a single dose of eribulin and found a significant reduction in the  
405 expression of genes involved in the MVA pathway and a significant up-regulation of genes  
406 involved in activation of immune responses. Cholesterol synthesis is important for cell  
407 membrane biogenesis and, therefore, cancer cell growth and proliferation<sup>68</sup>. Furthermore, there  
408 are indications that cholesterol is involved in EMT<sup>69,70</sup>. We hypothesised that the mechanism  
409 by which eribulin reduces EMT characteristics was by inhibiting cholesterol synthesis. To  
410 substantiate this finding, we analysed the expression of a key enzyme in the MVA pathway,  
411 HMGCS1, in PDX after a single dose of eribulin. We saw a reduction of HMGCS1 expression  
412 in four PDX. However, the three PDX that did not display reduced HMGCS1 expression after  
413 eribulin treatment lacked expression of N-MYC. We hypothesise that, as in neuroblastoma<sup>71</sup>,  
414 N-MYC drives OCS cell survival and drug resistance through the MVA pathway. This pathway  
415 appears to be targeted, at least in part, by eribulin, leading to reduced expression of N-MYC,  
416 HMGA2, and reversal of EMT characteristics.

417

418 The involvement of the MVA pathway in OCS survival suggests that statins may have  
419 therapeutic potential. However, in future studies of statins in OCS, it would be important to  
420 consider the tightly controlled SREBP2-mediated feedback loop, which acts to increase the  
421 expression of MVA pathway genes<sup>72</sup>. This is a potential mechanism of drug resistance, indeed  
422 it has been implicated in cisplatin resistance in ovarian cancer<sup>73</sup>, which may be overcome by  
423 combination regimens<sup>74</sup>. Considering, as we have demonstrated here, that eribulin can reduce  
424 the expression of many genes in the MVA pathway, combining eribulin with statins could  
425 potentially overcome resistance that might arise with statin therapy alone.

426

427 High levels of cholesterol have also been shown to play a protective role in cancer cells through  
428 inhibiting immune surveillance<sup>75</sup>. Indeed, in our OCS PDX models we also observed a  
429 significant increase in the expression of genes involved in immune activation following  
430 eribulin treatment. Thus, eribulin may initiate anti-tumour immune responses in OCS, as has  
431 been observed in other tumour types<sup>45,47,76</sup>. Therefore, early phase clinical trials in OCS for  
432 eribulin as a single agent and in combination with immunotherapy should be initiated to  
433 improve treatment options for OCS.

434

435 **Patients and Methods:**

## 436 **Study conduct, survival analyses and patient samples**

437 Overall survival was calculated from the date of diagnosis to the date of death or the last known  
438 clinical assessment. Overall survival was calculated by log-rank test (Mantel-Cox) using Prism  
439 v8.0 (GraphPad, San Diego, CA).

440

441 Formalin-fixed paraffin-embedded (FFPE) specimens were identified from the pathology  
442 archives of Queen Elizabeth University Hospital, Glasgow, UK. Following review by an expert  
443 gynaecological pathologist, areas of carcinoma and sarcoma were marked for macro-  
444 dissection.

445

## 446 **Panel Sequencing**

447 Libraries for sequencing were prepared from genomic DNA (gDNA) obtained from 5 x 10 $\mu$ m  
448 macro-dissected FFPE sections. A total input of 50-200ng per sample was used based on  
449 quantification with a Quant-iT PicoGreen dsDNA Assay Kit (Invitrogen, Carlsbad, CA, USA).

450 Each DNA sample was sheared using a Covaris LE220 focused-ultrasonicator (Covaris,  
451 Woburn, MA, USA) with the following settings: PIP450, Cycles/Burst 200, Duty Factor 15%,  
452 Water Level of 6, shearing time of 400 seconds (executed as 350 seconds, followed by a further  
453 50 seconds using the same settings). Pre-capture sample libraries were prepared on the

454 SciClone G3 NGS Workstation (Perkin Elmer, Waltham, MA, USA) using SureSelect XT  
455 standard automated protocol (Agilent Technologies, Santa Clara, CA, USA) for 200ng  
456 samples. Pre-capture sample libraries were quantified with the Quant-iT PicoGreen dsDNA  
457 Assay Kit. Quantification data were used to normalise all sample libraries to 750ng in a total

458 volume of 26.4 $\mu$ l; a full 26.4 $\mu$ l of sample library was brought forward for libraries with a total  
459 concentration too low to make this possible. Normalised pre-capture sample libraries were then  
460 captured using 120nt biotinylated custom RNA baits from a proprietary SureSelect XT custom  
461 6-11.9Mb panel (Agilent Technologies, Santa Clara, CA, USA). Captured libraries were

462 processed as a large panel, since more than 3Mb of sequence was intended for capture, and  
463 were incubated overnight to facilitate hybridisation, as per manufacturer's protocol. Captured  
464 sample library sequences were extracted from solution, cleaned up and prepared for post-  
465 capture PCR. Post-capture PCR incorporated primers with unique 8-bp indexes (Agilent

466 Technologies, Santa Clara, CA, USA) for multiplexing. Amplified capture libraries were  
467 cleaned up on a Zephyr G3 NGS Workstation (Perkin Elmer, Waltham, MA, USA), using a  
468 post-PCR SPRI bead clean-up protocol (Agilent Technologies, Santa Clara, CA, USA), to



469 produce final capture libraries. Final captured-libraries were quantified with the Quant-iT  
470 PicoGreen dsDNA Assay Kit and assessed for size distribution and quality on a LabChip GX  
471 DNA High Sensitivity Chip (Perkin Elmer, Waltham, MA, USA). 8 uniquely indexed sample  
472 libraries were pooled per lane of a HiSeq 4000 flow cell. Pools were clustered to the flow cell  
473 using a cbot 2 system and sequenced on a HiSeq 4000 (Illumina, San Diego, CA, USA) as per  
474 manufacturer's instructions to generate 2x75bp reads.

475

#### 476 **Panel design and analysis**

477 Genes for inclusion in the custom panel were selected from publicly available databases  
478 (including the Cancer Gene Census (CGC)<sup>77</sup>, Database of Curated Mutations (DoCM)<sup>78</sup> and  
479 Vogelstein et al's analysis of COSMIC<sup>79</sup>) as well as unbiased statistical screens<sup>80-83</sup>. For genes  
480 where driver events are mainly substitutions (e.g. *MAP2K1*, *GNA11*, *MTOR*, *NRAS*), the coding  
481 exons were included in the panel design. For genes where driver events are mainly copy number  
482 alterations (e.g. *CCND2*, *CCNE1*, *FGF3*, *MDM2*), approximately 20 marker SNPs spanning  
483 the gene footprint were included in the panel design. For key tumour suppressor genes (e.g.  
484 *BRCA1*, *BRCA2*, *CDKN2A*, *NF1*, *PTEN*, *RBI*) where driver events could be any inactivating  
485 sequence-level, structural or copy number change, the entire gene footprint was included in the  
486 panel design. In total, this panel assays 217 genes for coding sequence mutations, 137 genes  
487 for copy number state, and 23 genes for all genomic events. In addition, SNPs spaced  
488 approximately 1Mb apart throughout the genome were included to give a genome-wide copy  
489 number profile. Total sequence capture size was 3.465MB.

490

491 Sequencing data were analysed using HOLMES, a proprietary pipeline that uses a Snakemake<sup>84</sup>  
492 workflow to run the following data processing steps: 1) `bcl2fastq v2.19.1`  
493 ([https://support.illumina.com/sequencing/sequencing\\_software/bcl2fastq-conversion-software.html](https://support.illumina.com/sequencing/sequencing_software/bcl2fastq-conversion-software.html))  
494 or fastq generation and adapter trimming. 2) `bwa mem v0.7.15`<sup>85</sup> for alignment to GRCh38 and  
495 `biobambam v2.0.72`<sup>86</sup> for sorting, indexing, duplicate marking and duplicate removal. 3)  
496 `samtools stats v1.5`<sup>87</sup> to generate QC metrics. 4) `Shearwater/deepSNV v1.22.0`<sup>88,89</sup> to call point  
497 mutations from properly paired reads only, using all samples from this project as the cohort,  
498 with the following filters then applied: there must be no evidence for the same mutation in the  
499 matched normal, the average mapping quality of reads supporting the variant must be  $\geq 20$ , the  
500 variant must not be present in the 1000 Genomes Project, at least a third of bases reporting the  
501 mutation must have a base quality of at  $\geq 20$ , the allele frequency of the mutation must be at

502 least 5%, there must be  $\geq 20$  reads covering the variant position and at least 3 must contain the  
503 mutation, the ratio of forward to reverse reads containing the mutation must be between 0.15  
504 and 6.67 inclusive, not more than 10% of reads containing the mutation can contain an indel  
505 with 10 bp of the variant position. 5) Pindel v0.2.5b8<sup>90</sup> to call indels, with the following filters  
506 applied: only reads with a mapping quality of  $\geq 10$  are used as anchors, the variant must not be  
507 present in the 1000 Genomes Project, there must be no evidence for the same indel in the  
508 matched normal if it is  $>4$ bp long or the allele frequency of the indel must be 10x higher in the  
509 tumour than in the matched normal if it is  $\leq 4$ bp long, at least 3 reads must report the indel, the  
510 same indel must not be called in any of the matched normals in this project, the allele frequency  
511 of the indel must be at least 5%, the ratio of forward to reverse reads containing the indel must  
512 be between 0.1 and 10 inclusive. 6) Annotation of both substitutions and indels with CAVA  
513 v1.2.2.<sup>91</sup> 7) GeneCN v1.0 as described previously<sup>92</sup> for calling the copy number state of genes  
514 and generate genome-wide copy number plots. Samples with high levels of noise, identified as  
515 those with large standard deviations within each genomic feature, were excluded from copy  
516 number analysis. This excluded WW00153c, WW00169a and WW00170c from individual  
517 analyses. 8) Brass (brass-groups command only) v5.3.3 (<https://github.com/cancerit/BRASS>)  
518 for calling structural variants (SVs) with the following filters applied: only reads with a  
519 mapping quality of  $\geq 10$  are considered to support an SV,  $\geq 10$  read pairs must support an SV,  
520 SVs must not fall within the mitochondrial genome or any unplaced or alternative contig, there  
521 must be no evidence for the same SV in the matched normal, there must be no evidence of the  
522 same SV in any of the matched normals in this project.

523

524 To compare the copy number profiles of the sarcoma and carcinoma components, GeneCN was  
525 modified to use R's scale function to centre and scale the data to account for different cellularity  
526 between samples. One profile was then subtracted from the other and calling performed on the  
527 resulting difference between the two profiles.

528

### 529 **RNA sequencing library generation and sequencing**

530 RNA-seq libraries for the FFPE OCS patient cohort were generated as described in TruSeq  
531 Stranded Total RNA Sample Preparation Guide (Illumina, part no. 15031048 Rev. E October  
532 2013) using Illumina TruSeq Stranded Total RNA LT sample preparation kit. Ribosomal  
533 depletion step was performed on 500ng of total RNA using Ribo-Zero Gold (Illumina,  
534 20020598 and 20020492). Heat fragmentation step was adjusted depending on RIN score (0 to

535 8 min) aimed at producing libraries with an insert size between 120-200bp. First strand cDNA  
536 was synthesised from the enriched and fragmented RNA using SuperScript II Reverse  
537 Transcriptase (Thermofisher, 18064014) and random primers. Second strand synthesis was  
538 performed in the presence of dUTP. Following 3' adenylation and ligation of adaptors to the  
539 dsDNA, libraries were subjected to 13 cycles of PCR. RNA-seq libraries were quantified using  
540 PicoGreen assay (Thermofisher, P11496) and sized and qualified using an Agilent 4200  
541 TapeStation with Agilent D1000/High sensitivity ScreenTape (Agilent, 5067-5584). Libraries  
542 were normalised to 4nM and pooled before clustering using a cBot2 followed by 75bp paired-  
543 end sequencing on a HiSeq 4000 sequencer (Illumina).

544

545 RNAseq\_V2 processed counts for HGSC from TCGA (TCGA-OV cohort) (n=396) were  
546 downloaded from the GDC portal (<https://portal.gdc.cancer.gov/>), version available on 3<sup>rd</sup> June  
547 2019. In total, there were n = 374 files for primary tumours and n = 5 recurrent tumours. Counts  
548 were normalised across samples using DESeq2's median of ratios method<sup>93</sup>. Carcinosarcoma  
549 RNAseq data (n = 27) underwent QC and was found to be satisfactory as per the parameters in  
550 FastQC (v.0.11.8 available at <http://www.bioinformatics.babraham.ac.uk/projects/fastqc/>).  
551 Using quasi-mapping method in Salmon version 0.8.2<sup>94</sup>, RNAseq data was aligned to GRCh37  
552 Ensembl release 75<sup>95</sup> transcriptome. Only those samples where rRNA reads account for less  
553 than 20% of the total reads were retained for the downstream analyses, n = 22 (n = 5 samples  
554 were excluded, Supplementary Figure S3). Differentially expressed genes (DEGs) between the  
555 carcinoma and sarcoma components were derived using the DESeq2 package<sup>93</sup>. The Database  
556 for Annotation, Visualization and Integrated Discovery (DAVID) online Functional  
557 Annotation Tool was used for functional annotation of Differentially Expressed Genes (DEG).

558 For EMT gene set enrichment analysis, SingScore<sup>96</sup> was used with a representative directional  
559 gene set<sup>49</sup>. Counts were normalised by rank normalisation<sup>98</sup> followed by the centred log-ratio  
560 transformation<sup>97</sup>. All analyses, statistical tests, and plots were generated in R version 3.3.3  
561 unless specified otherwise.

562 RNAseq libraries for the PDX tumours were prepared using TruSeq RNA Library Prep Kit v2  
563 (Illumina), and the sequencing was performed on the Novaseq platform to read length of 100  
564 bp (Australian Genome Research Facility). Reads were mapped to the GRCh38 Ensembl  
565 release 97 transcriptome and quantified using Kallisto<sup>98</sup>. Counts were normalised and EMT  
566 gene set enrichment analysis undertaken as above. DEGs between treated and untreated

567 samples were derived using matching methods across batch and model to correct for batch  
568 effects and inherent model differences. *p*-values for DEGs were computed under a normality  
569 assumption. Topconfects<sup>99</sup> was used to calculate lower bounds on the effect sizes with 95%  
570 confidence.

571

### 572 **Generation of a genetically-engineered mouse model (GEMM)**

573 The *Pax8-rtTA* strain (C57BL/6 background) was a kind gift from Prof Ronny Drapkin  
574 (University of Pennsylvania, Department of Obstetrics and Gynecology, US). The *kai-tetOCre*  
575 strain (FVB background) was a kind gift from Prof Jane Visvader (WEHI, Melbourne,  
576 Australia) originally sourced from the Osaka Bioscience Institute, Japan. The *LSL-Lin28b*  
577 strain (mixed 129X1/SvJ background) was a kind gift from Prof Johannes H. Schulte  
578 (University Hospital Essen, Germany; Supplementary Table 14). Mice with multiple  
579 transgenes were generated through crossing and breeding mice on a mixed background,  
580 predominantly FVB/NJ and C57BL/6. Genotyping was performed using custom designed  
581 probes (TransnetYX, Inc; Supplementary Table S15). Activation of the transgenes was  
582 achieved through the administration of doxycycline, either by chow (Glen Forrest Stockfeeders  
583 SF08-026) or through drinking water (Sigma-Aldrich) at 600mg/kg or 0.2mg/ml respectively.  
584 Mice age between 3 weeks and 7 weeks and were treated for 2 weeks to allow adequate  
585 doxycycline exposure. Fallopian tubes were carefully micro-dissected, gently minced, and  
586 transplanted into the ovarian bursae of CBA/nu mice.

587

### 588 **Immunohistochemistry**

589 Formalin fixed tumour samples were sectioned stained with haematoxylin and eosin (H&E) as  
590 well as being sent for automatic immunostaining using the Ventana BenchMark Ultra fully  
591 automated staining instrument (Roche Diagnostics, USA). The following antibodies were used:  
592 anti-Ki67 (mouse: D3B5, Cell Signalling; human: MIB-1, Dako), anti-PAX8 (polyclonal,  
593 Proteintech), anti-p53 (mouse: CM5, Novacastra; human: DO-7, Dako), anti-PanCK (mouse:  
594 polyclonal, Abcam; human: AE1/3, Dako), anti-Vimentin (D21H3, Cell Signalling), anti-  
595 HMGA2 (D1A7, Cell Signalling), anti-N-cadherin (polyclonal, Abcam), and anti-ZEB1  
596 (polyclonal, NovusBio). H&E and IHC slides were scanned digitally at 20x magnification  
597 using the Panoramic 1000 scanner (3DHISTECH Ltd.). High definition images were  
598 uploaded into CaseCenter (3DHISTECH Ltd.) and images were processed using FIJI image  
599 application<sup>100</sup>.

600

## 601 **Western Blot Analysis**

602 Tumours homogenised in ice-cold RIPA buffer (50 mM Tris; pH7.5, 150 mM NaCl, 1% NP40,  
603 0.5% sodium deoxycholate, 0.1% SDS in H<sub>2</sub>O, supplemented with a complete mini protease  
604 inhibitor cocktail tablet (Roche)) using Precellys Ceramic Kit tubes in the Precellys 24  
605 homogenising instrument (Thermo Fisher Scientific). Proteins from lysates were separated on  
606 NuPAGE® Novex® Bis-Tris 10% gels (Invitrogen). Gels were transferred onto PVDF  
607 membranes using the iBlot™ Transfer system (Thermo Fish Scientific). Membranes were  
608 probed with antibodies specific for ZEB1, N-cadherin, Vimentin, HMGA2 (all as mentioned  
609 previously), N-MYC (D1V2A, Cell Signalling), HMGCS1 (A-6, Santa Cruz), or β-actin (AC-  
610 15, Sigma).

611

## 612 **Sample processing for RNA and DNA**

613 Total RNA was isolated from snap-frozen cells or tumours using the Direct-zol™ RNA  
614 Miniprep kit (Zymo Research) as per manufacturer's instructions. Tumour DNA was isolated  
615 from snap-frozen cells or tumours using the QIAamp DNA mini kit (Qiagen) as per  
616 manufacturer's instructions.

617

## 618 ***In vivo* studies**

619 PDX SFRC01040 was obtained from the Royal Women's Hospital under the Australian  
620 Ovarian Cancer Study and generated by mixing tumour cells isolated from ascites with  
621 Matrigel Matrix (Corning) and transplanting subcutaneously into NOD/SCID/IL2Rγnull  
622 recipient mice (T1 = passage 1). All other PDXs were rescued through transplanting fragments  
623 of cryopreserved tumour tissue subcutaneously from PDXs generated in the Mayo Clinic  
624 (USA). GEMM tumours were generated as described above. Recipient mice bearing T2-T7  
625 PDX or GEMM tumours (180-300 mm<sup>3</sup> in size) were randomly assigned to cisplatin (Pfizer),  
626 pegylated liposomal doxorubicin (PLD; Janssen-Cilag Pty. Ltd.), paclitaxel (Bristol-Myers  
627 Squibb), vinorelbine (Pfizer), eribulin (Eisai Co., Ltd.), or vehicle treatment groups. *In vivo*  
628 cisplatin treatments were performed by intraperitoneal (IP) injection of 4 mg/kg given on days  
629 1, 8 and 18. The regimen for PLD treatment was by IP injection once a week for three weeks  
630 at 1.5 mg/kg. The regimen for paclitaxel treatment was by IP injection twice a week for three  
631 weeks at 25 mg/kg. The regimen for vinorelbine was by intravenous injection of 15 mg/kg at  
632 days 1, 8 and 18. The regimen for eribulin treatment was by IP injection three times a week for

633 three weeks at 1.5 mg/kg (with the exception of mice harbouring SFRC01040 tumours, which  
634 received doses of 1 mg/kg with the same scheduling). Vehicle for cisplatin, PLD, paclitaxel,  
635 vinorelbine and eribulin treatment was Dulbecco's Phosphate Buffered Saline (DPBS).  
636 Electronic calliper measurements of the primary tumour size were taken twice a week until  
637 tumours reached 600-700 mm<sup>3</sup> or when mice reached ethical endpoint. Data collection was  
638 conducted using the Studylog LIMS software (Studylog Systems, San Francisco). Graphing  
639 and statistical analysis was conducted using the SurvivalVolume package<sup>101</sup>.

640

641 Cisplatin *in vivo* response in PDX was assessed as previously described<sup>59</sup>. One hundred days  
642 was chosen as a conservative measure to differentiate between cisplatin sensitivity versus  
643 resistance for PDX. We defined response as being "cisplatin sensitive" if the average PDX  
644 tumour volume of the recipient mice underwent initial tumour regression with complete  
645 remission (CR, defined as tumour volume < 50 mm<sup>3</sup>) or partial remission (PR, defined as  
646 reduction in tumour volume of >30% from baseline) followed by progressive disease (PD, an  
647 increase in tumour volume of >20% from 200 mm<sup>3</sup> or nadir post-treatment, if nadir ≥ 200 mm<sup>3</sup>)  
648 occurring ≥ 100 days from start of treatment; "cisplatin resistant" if initial tumour regression  
649 (CR or PR) or stable disease (SD) was followed by PD within 100 days; or "cisplatin  
650 refractory" if three or more mice bearing that PDX had tumours which failed to respond (no  
651 CR, PR or SD) during cisplatin treatment (day 1-18).

652

653 Time to progression (TTP or PD), time to harvest (TTH), and treatment responses are as  
654 defined previously<sup>59</sup>. Stable disease (SD) was achieved if TTP for the treatment group was at  
655 least twice as long as TTP for corresponding vehicle treated group.

656

### 657 **Generation of cell lines**

658 An OCS GEMM cell line was generated from a T1 OCS GEMM tumour. Briefly, the tumour  
659 was manually minced into a slurry using two scalpel blades and resuspended in DMEM/F-12  
660 GlutaMAX medium (Gibco) supplemented with 10% fetal calf serum (FCS). Cell fragments  
661 were subsequently plated on 0.1% gelatin coated plate and passaged aggressively within 3-4  
662 days to retain viable malignant adherent cells until a stable cell line was obtained at p12  
663 onward. Cell identity was confirmed by genotyping (as for GEMM tumours). OCS GEMM  
664 cells were grown in DMEM/F-12 GlutaMAX medium (Gibco) supplemented with 10% FCS,  
665 50 ng/mL EGF and 1 µg/mL hydrocortisone in 5% CO<sub>2</sub> at 37°C.



666

### 667 **Adhesion, invasion assays and 3D growth assays**

668 Adhesion assays were carried out in 96-well plates pre-coated with 2% BSA or 20 µg/ml  
669 collagen. GEMM cells were pre-treated for a week with DMSO (vehicle control), 0.2 µM  
670 cisplatin or 20 nM eribulin. Pre-treated cells were plated at a cell density of  $2 \times 10^5$  cells/well  
671 in triplicate in pre-coated wells and allowed to adhere for 2 hours. Non-adherent cells were  
672 aspirated and adherent cells stained with 100 µl of 0.5% crystal violet (Sigma) dissolved in  
673 20% methanol for 15 min at room temperature. Stained cells were solubilised with 50 µl of 0.1  
674 M citrate buffer in 50% methanol. Adherent cells were quantified by measuring absorbance at  
675 595 nm on a Chameleon Luminescence Plate Reader (Noki Technologies). Transwell  
676 migration and invasion assays were carried out as previously described<sup>102</sup>. Briefly,  $2.5 \times 10^5$   
677 pre-treated GEMM cells (as above) were seeded into Matrigel-coated transwells and medium  
678 supplemented with 10% FCS placed in the bottom wells to act as a chemoattractant. Parallel  
679 assays were carried out in uncoated control transwell inserts to assess cell migration in the  
680 absence of extracellular matrix (ECM). 3D growth assays were carried out as previously  
681 described<sup>102</sup>. Briefly, wells of a 48-well plate were pre-coated with 1.5 mg/mL collagen  
682 (Thermo Fisher Scientific) in DMEM and incubated at room temperature until collagen became  
683 solid. Pre-treated (as above) or untreated GEMM OCS cells were resuspended in 1.5 mg/mL  
684 collagen/DMEM, plated at  $0.02 \times 10^5$  cells/well, and incubated at room temperature until  
685 collagen became solid. Medium was added to each well and cells incubated at 37°C/5% CO<sub>2</sub>  
686 for 8-10 days.

687

### 688 **Statistical Analysis**

689 Data was analysed using the Student t-test unless otherwise stated and considered significant  
690 when the *p* value was <0.05. All statistical tests were two-sided. Bar graphs represent the mean  
691 and standard error across independent experimental repeats unless otherwise stated. Survival  
692 analysis was performed using the log rank test on Kaplan-Meier survival function estimates.  
693 Statistical significance representations: \**p*<0.05, \*\**p*<0.01, \*\*\**p*<0.001.

694

### 695 **Ethics**

696 Samples for the UK cohort were acquired and utilised under the authority of the NHS Greater  
697 Glasgow and Clyde Biorepository (Application Reference 286) following approval by West of  
698 Scotland Research Ethics Committee 4 (Reference 10/S0704/60). All animal studies and

699 procedures were approved by the Walter and Eliza Hall Institute of Medical Research (WEHI)  
700 Animal Ethics Committee (#2019.024) and performed following guidelines for the welfare and  
701 use of animals in cancer research.

702

### 703 **Acknowledgements**

704 We thank S. Stoev, R. Hancock, and K. Barber for technical assistance. We thank Prof Ronny  
705 Drapkin, Prof Jane Visvader (and Osaka Bioscience Institute, Japan), and Prof Johannes H.  
706 Schulte for kind gifts of the mouse strains used to generate the GEMM. We thank Eisai Co.,  
707 Ltd. for supply of eribulin. This work was supported by fellowships and grants from the  
708 National Health and Medical Research Council (NHMRC Australia; Project grants 1062702  
709 (CLS) and 1104348 (CLS and MJW), Senior Research Fellowship 1116955 (ATP)); the  
710 Stafford Fox Medical Research Foundation (CLS, HEB, JB, ATP); the Lorenzo and Pamela  
711 Galli Charitable Trust (ATP); Cancer Council Victoria (Sir Edward Dunlop Fellowship in  
712 Cancer Research to CLS and Ovarian Cancer Research Grant-in-Aid 1186314 to CIA HEB,  
713 CIC CJV and CID GR); the Victorian Cancer Agency (Clinical Fellowships to CLS CRF10-  
714 20, CRF16014); CRC for Cancer Therapeutics (PhD top-up scholarship to GH); Research  
715 Training Program Scholarship (PhD Scholarship to GH). This work was made possible through  
716 the Australian Cancer Research Foundation, the Victorian State Government Operational  
717 Infrastructure Support and Australian Government NHMRC IRIISS. The Scottish Genomes  
718 Partnership is funded by the Chief Scientist Office of the Scottish Government Health  
719 Directorates (grant reference SGP/1) and The Medical Research Council Whole Genome  
720 Sequencing for Health and Wealth Initiative. Additional funding was provided by the Medical  
721 Research Council (the Glasgow Molecular Pathology Node, grant reference MR/N005813/1),  
722 Cancer Research UK (grant references A15973 [IMcN] and A17263 [AVB]), the Wellcome  
723 Trust (grant reference 103721/Z/14/Z [AVB]) and the Beatson Cancer Charity (grant reference  
724 15-16-051 [IMcN, PR]). Support was also provided by Ovarian Cancer Action, the Cancer  
725 Research UK Centres and Experimental Cancer Medicine Centres at both Glasgow and  
726 Imperial and the NIHR Imperial Biomedical Research Centre.

727 The Australian Ovarian Cancer Study Group was supported by the U.S. Army Medical  
728 Research and Materiel Command under DAMD17-01-1-0729, The Cancer Council Victoria,  
729 Queensland Cancer Fund, The Cancer Council New South Wales, The Cancer Council South  
730 Australia, The Cancer Council Tasmania and The Cancer Foundation of Western Australia  
731 (Multi-State Applications 191, 211 and 182) and the National Health and Medical Research  
732 Council of Australia (NHMRC; ID199600; ID400413 and ID400281).

733 The Australian Ovarian Cancer Study gratefully acknowledges additional support from  
734 Ovarian Cancer Australia and the Peter MacCallum Foundation. The AOCS also acknowledges  
735 the cooperation of the participating institutions in Australia and acknowledges the contribution  
736 of the study nurses, research assistants and all clinical and scientific collaborators to the study.  
737 The complete AOCS Study Group can be found at [www.aocstudy.org](http://www.aocstudy.org). We would like to thank  
738 all of the women who participated in these research programs.

739

#### 740 **Author contributions**

741 C.L.S., M.J.W., I.A.M., H.E.B, and A.T.P. designed the study, developed methodology,  
742 analysed data, wrote the manuscript and supervised the study. G.Y.H. and E.L.K. performed  
743 experiments, analysed data, and wrote the manuscript. J.B. analysed data, supervised the study  
744 and reviewed the manuscript. E.L., C.J.V. and O.K., developed methodology, performed  
745 experiments, analysed data and reviewed the manuscript. D.P.E., R.U.-G., U.-M.B., S.D., G.B.  
746 and G.R. performed experiments and reviewed the manuscript. H.B.M. analysed data, wrote  
747 and reviewed the manuscript. P.R., R.M.G. and A.V.B. supervised the study and reviewed the  
748 manuscript. S.L.C designed the study, developed methodology, analysed data, supervised the  
749 study and reviewed the manuscript. O.McN., A. DeF., J.W. and D.D.B. acquired data or  
750 samples, supervised the study and reviewed the manuscript. N.T. acquired data, provided  
751 administrative support and reviewed the manuscript. AOCS acquired data and reviewed the  
752 manuscript.

753

#### 754 **Conflicts of interest**

755 Disclosure of Potential Conflicts of interest: Eisai Inc provided drug support for this study.  
756 RMG declares Advisory boards for Clovis, Tesaro and AstraZeneca. AVB declares Personal  
757 and Financial interest in BMS, AstraZeneca, MyTomorrows, Elstar Therapeutics, IP Financial  
758 Interest in Agilent Technologies, Leadership role, stock ownership in Cumulus Oncology,  
759 Nodus Oncology, ConcR, Cambridge Cancer Genomics. IAMcN declares Advisory Boards for  
760 Clovis Oncology, Tesaro/GSK, AstraZeneca, Roche, Scancell, Carrick Therapeutics, Takeda  
761 Oncology; Institutional grant support from AstraZeneca. DDB declares Consultant for Exo  
762 Therapeutics. Research Support for AstraZeneca, Roche, GNE, Beigene. CLS declares  
763 Advisory Boards for AstraZeneca, Clovis Oncology, Roche, Eisai Inc, Sierra Oncology,  
764 Takeda, MSD and Grant/Research support from Clovis Oncology, Eisai Inc, Sierra Oncology,  
765 Roche and Beigene. Other authors declare no conflicts of interest.

766

## 767 References

- 768 1. Rauh-Hain, J.A., *et al.* Patterns of care, predictors and outcomes of chemotherapy for  
769 ovarian carcinosarcoma: A National Cancer Database analysis. *Gynecol Oncol* **142**, 38-  
770 43 (2016).
- 771 2. Mano, M.S., *et al.* Current management of ovarian carcinosarcoma. *Int J Gynecol*  
772 *Cancer* **17**, 316-324 (2007).
- 773 3. Rauh-Hain, J.A., Birrer, M. & Del Carmen, M.G. "Carcinosarcoma of the ovary,  
774 fallopian tube, and peritoneum: Prognostic factors and treatment modalities". *Gynecol*  
775 *Oncol* **142**, 248-254 (2016).
- 776 4. Abeln, E.C., *et al.* Molecular genetic evidence for the conversion hypothesis of the  
777 origin of malignant mixed mullerian tumours. *J Pathol* **183**, 424-431 (1997).
- 778 5. Growdon, W.B., *et al.* Tissue-specific signatures of activating PIK3CA and RAS  
779 mutations in carcinosarcomas of gynecologic origin. *Gynecol Oncol* **121**, 212-217  
780 (2011).
- 781 6. Jin, Z., *et al.* Carcinosarcomas (malignant mullerian mixed tumors) of the uterus and  
782 ovary: a genetic study with special reference to histogenesis. *Int J Gynecol Pathol* **22**,  
783 368-373 (2003).
- 784 7. Kounelis, S., *et al.* Carcinosarcomas (malignant mixed mullerian tumors) of the female  
785 genital tract: comparative molecular analysis of epithelial and mesenchymal  
786 components. *Hum Pathol* **29**, 82-87 (1998).
- 787 8. Gotoh, O., *et al.* Clinically relevant molecular subtypes and genomic alteration-  
788 independent differentiation in gynecologic carcinosarcoma. *Nat Commun* **10**, 4965  
789 (2019).
- 790 9. Zhao, S., *et al.* Mutational landscape of uterine and ovarian carcinosarcomas implicates  
791 histone genes in epithelial-mesenchymal transition. *Proc Natl Acad Sci U S A* **113**,  
792 12238-12243 (2016).
- 793 10. del Carmen, M.G., Birrer, M. & Schorge, J.O. Carcinosarcoma of the ovary: a review  
794 of the literature. *Gynecol Oncol* **125**, 271-277 (2012).
- 795 11. Costa, M.J., Vogelsan, J. & Young, L.J. p53 gene mutation in female genital tract  
796 carcinosarcomas (malignant mixed mullerian tumors): a clinicopathologic study of 74  
797 cases. *Mod Pathol* **7**, 619-627 (1994).
- 798 12. Fujii, H., *et al.* Frequent genetic heterogeneity in the clonal evolution of gynecological  
799 carcinosarcoma and its influence on phenotypic diversity. *Cancer Res* **60**, 114-120  
800 (2000).
- 801 13. Liu, F.S., *et al.* Mutation and overexpression of the p53 tumor suppressor gene  
802 frequently occurs in uterine and ovarian sarcomas. *Obstet Gynecol* **83**, 118-124 (1994).
- 803 14. Cantrell, L.A. & Van Le, L. Carcinosarcoma of the ovary a review. *Obstet Gynecol*  
804 *Surv* **64**, 673-680; quiz 697 (2009).
- 805 15. Jones, S., *et al.* Genomic analyses of gynaecologic carcinosarcomas reveal frequent  
806 mutations in chromatin remodelling genes. *Nat Commun* **5**, 5006 (2014).
- 807 16. Carnevali, I.W., *et al.* Two Cases of Carcinosarcomas of the Ovary Involved in  
808 Hereditary Cancer Syndromes. *Int J Gynecol Pathol* **36**, 64-70 (2017).
- 809 17. Pennington, K.P., *et al.* Germline and somatic mutations in homologous recombination  
810 genes predict platinum response and survival in ovarian, fallopian tube, and peritoneal  
811 carcinomas. *Clin Cancer Res* **20**, 764-775 (2014).
- 812 18. Herzog, T., Xiu, J., Bender, R., Gatalica, Z. & Reddy, S. BRCA1 and BRCA2 mutations  
813 in 1691 epithelial ovarian tumors identify subgroups with distinct molecular  
814 characteristics. *European Journal of Cancer* **51**, S554-S555 (2015).

- 815 19. Sonoda, Y., Saigo, P.E., Federici, M.G. & Boyd, J. Carcinosarcoma of the ovary in a  
816 patient with a germline BRCA2 mutation: evidence for monoclonal origin. *Gynecol*  
817 *Oncol* **76**, 226-229 (2000).
- 818 20. Morishita, A., *et al.* HMGA2 is a driver of tumor metastasis. *Cancer Res* **73**, 4289-4299  
819 (2013).
- 820 21. Elton, T.S., Nissen, M.S. & Reeves, R. Specific A . T DNA sequence binding of RP-  
821 HPLC purified HMG-I. *Biochem Biophys Res Commun* **143**, 260-265 (1987).
- 822 22. Reeves, R. & Nissen, M.S. The A.T-DNA-binding domain of mammalian high mobility  
823 group I chromosomal proteins. A novel peptide motif for recognizing DNA structure.  
824 *J Biol Chem* **265**, 8573-8582 (1990).
- 825 23. Solomon, M.J., Strauss, F. & Varshavsky, A. A mammalian high mobility group protein  
826 recognizes any stretch of six A.T base pairs in duplex DNA. *Proc Natl Acad Sci U S A*  
827 **83**, 1276-1280 (1986).
- 828 24. Strauss, F. & Varshavsky, A. A protein binds to a satellite DNA repeat at three specific  
829 sites that would be brought into mutual proximity by DNA folding in the nucleosome.  
830 *Cell* **37**, 889-901 (1984).
- 831 25. Gattas, G.J., Quade, B.J., Nowak, R.A. & Morton, C.C. HMGIC expression in human  
832 adult and fetal tissues and in uterine leiomyomata. *Genes Chromosomes Cancer* **25**,  
833 316-322 (1999).
- 834 26. Rogalla, P., *et al.* HMGI-C expression patterns in human tissues. Implications for the  
835 genesis of frequent mesenchymal tumors. *Am J Pathol* **149**, 775-779 (1996).
- 836 27. Chang, K.P., *et al.* Low-molecular-mass secretome profiling identifies HMGA2 and  
837 MIF as prognostic biomarkers for oral cavity squamous cell carcinoma. *Sci Rep* **5**,  
838 11689 (2015).
- 839 28. Piscuoglio, S., *et al.* HMGA1 and HMGA2 protein expression correlates with advanced  
840 tumour grade and lymph node metastasis in pancreatic adenocarcinoma.  
841 *Histopathology* **60**, 397-404 (2012).
- 842 29. Saada-Bouزيد, E., *et al.* Prognostic value of HMGA2, CDK4, and JUN amplification  
843 in well-differentiated and dedifferentiated liposarcomas. *Mod Pathol* **28**, 1404-1414  
844 (2015).
- 845 30. Sun, M., *et al.* RKIP and HMGA2 regulate breast tumor survival and metastasis through  
846 lysyl oxidase and syndecan-2. *Oncogene* **33**, 3528-3537 (2014).
- 847 31. Wang, X., *et al.* Overexpression of HMGA2 promotes metastasis and impacts survival  
848 of colorectal cancers. *Clin Cancer Res* **17**, 2570-2580 (2011).
- 849 32. Lee, Y.S. & Dutta, A. The tumor suppressor microRNA let-7 represses the HMGA2  
850 oncogene. *Genes Dev* **21**, 1025-1030 (2007).
- 851 33. Mayr, C., Hemann, M.T. & Bartel, D.P. Disrupting the pairing between let-7 and  
852 Hmga2 enhances oncogenic transformation. *Science* **315**, 1576-1579 (2007).
- 853 34. Park, S.M., *et al.* Let-7 prevents early cancer progression by suppressing expression of  
854 the embryonic gene HMGA2. *Cell Cycle* **6**, 2585-2590 (2007).
- 855 35. Shell, S., *et al.* Let-7 expression defines two differentiation stages of cancer. *Proc Natl*  
856 *Acad Sci U S A* **104**, 11400-11405 (2007).
- 857 36. Helland, A., *et al.* Deregulation of MYCN, LIN28B and LET7 in a molecular subtype  
858 of aggressive high-grade serous ovarian cancers. *PLoS One* **6**, e18064 (2011).
- 859 37. Wang, T., *et al.* Aberrant regulation of the LIN28A/LIN28B and let-7 loop in human  
860 malignant tumors and its effects on the hallmarks of cancer. *Mol Cancer* **14**, 125 (2015).
- 861 38. Tohill, R.W., *et al.* Novel molecular subtypes of serous and endometrioid ovarian  
862 cancer linked to clinical outcome. *Clin Cancer Res* **14**, 5198-5208 (2008).
- 863 39. Mahajan, A., *et al.* HMGA2: a biomarker significantly overexpressed in high-grade  
864 ovarian serous carcinoma. *Mod Pathol* **23**, 673-681 (2010).



- 865 40. Jordan, M.A., *et al.* The primary antimetabolic mechanism of action of the synthetic  
866 halichondrin E7389 is suppression of microtubule growth. *Mol Cancer Ther* **4**, 1086-  
867 1095 (2005).
- 868 41. Okouneva, T., Azarenko, O., Wilson, L., Littlefield, B.A. & Jordan, M.A. Inhibition of  
869 centromere dynamics by eribulin (E7389) during mitotic metaphase. *Mol Cancer Ther*  
870 **7**, 2003-2011 (2008).
- 871 42. Funahashi, Y., *et al.* Eribulin mesylate reduces tumor microenvironment abnormality  
872 by vascular remodeling in preclinical human breast cancer models. *Cancer Sci* **105**,  
873 1334-1342 (2014).
- 874 43. Kawano, S., Asano, M., Adachi, Y. & Matsui, J. Antimetabolic and Non-mitotic Effects  
875 of Eribulin Mesilate in Soft Tissue Sarcoma. *Anticancer Res* **36**, 1553-1561 (2016).
- 876 44. Yoshida, T., *et al.* Eribulin mesilate suppresses experimental metastasis of breast cancer  
877 cells by reversing phenotype from epithelial-mesenchymal transition (EMT) to  
878 mesenchymal-epithelial transition (MET) states. *Br J Cancer* **110**, 1497-1505 (2014).
- 879 45. Ito, K., *et al.* Antitumor effects of eribulin depend on modulation of the tumor  
880 microenvironment by vascular remodeling in mouse models. *Cancer Sci* **108**, 2273-  
881 2280 (2017).
- 882 46. Ueda, S., *et al.* In vivo imaging of eribulin-induced reoxygenation in advanced breast  
883 cancer patients: a comparison to bevacizumab. *Br J Cancer* **114**, 1212-1218 (2016).
- 884 47. Kashiwagi, S., *et al.* Use of Tumor-infiltrating lymphocytes (TILs) to predict the  
885 treatment response to eribulin chemotherapy in breast cancer. *PLoS One* **12**, e0170634  
886 (2017).
- 887 48. Schoffski, P., *et al.* Eribulin versus dacarbazine in previously treated patients with  
888 advanced liposarcoma or leiomyosarcoma: a randomised, open-label, multicentre,  
889 phase 3 trial. *Lancet* **387**, 1629-1637 (2016).
- 890 49. Chiyoda, T., *et al.* Expression profiles of carcinosarcoma of the uterine corpus-are these  
891 similar to carcinoma or sarcoma? *Genes Chromosomes Cancer* **51**, 229-239 (2012).
- 892 50. Cancer Genome Atlas Research, N. Integrated genomic analyses of ovarian carcinoma.  
893 *Nature* **474**, 609-615 (2011).
- 894 51. Byers, L.A., *et al.* An epithelial-mesenchymal transition gene signature predicts  
895 resistance to EGFR and PI3K inhibitors and identifies Axl as a therapeutic target for  
896 overcoming EGFR inhibitor resistance. *Clin Cancer Res* **19**, 279-290 (2013).
- 897 52. Mak, M.P., *et al.* A Patient-Derived, Pan-Cancer EMT Signature Identifies Global  
898 Molecular Alterations and Immune Target Enrichment Following Epithelial-to-  
899 Mesenchymal Transition. *Clin Cancer Res* **22**, 609-620 (2016).
- 900 53. Tan, T.Z., *et al.* Epithelial-mesenchymal transition spectrum quantification and its  
901 efficacy in deciphering survival and drug responses of cancer patients. *EMBO Mol Med*  
902 **6**, 1279-1293 (2014).
- 903 54. Laviolette, L.A., *et al.* 17beta-estradiol accelerates tumor onset and decreases survival  
904 in a transgenic mouse model of ovarian cancer. *Endocrinology* **151**, 929-938 (2010).
- 905 55. Molenaar, J.J., *et al.* LIN28B induces neuroblastoma and enhances MYCN levels via  
906 let-7 suppression. *Nat Genet* **44**, 1199-1206 (2012).
- 907 56. Schonig, K., Schwenk, F., Rajewsky, K. & Bujard, H. Stringent doxycycline dependent  
908 control of CRE recombinase in vivo. *Nucleic Acids Res* **30**, e134 (2002).
- 909 57. Traykova-Brauch, M., *et al.* An efficient and versatile system for acute and chronic  
910 modulation of renal tubular function in transgenic mice. *Nat Med* **14**, 979-984 (2008).
- 911 58. Sherman-Baust, C.A., *et al.* A genetically engineered ovarian cancer mouse model  
912 based on fallopian tube transformation mimics human high-grade serous carcinoma  
913 development. *J Pathol* **233**, 228-237 (2014).



- 914 59. Topp, M.D., *et al.* Molecular correlates of platinum response in human high-grade  
915 serous ovarian cancer patient-derived xenografts. *Mol Oncol* **8**, 656-668 (2014).
- 916 60. Rauh-Hain, J.A., *et al.* Carcinosarcoma of the ovary: a case-control study. *Gynecol*  
917 *Oncol* **121**, 477-481 (2011).
- 918 61. Brackmann, M., *et al.* Comparison of first-line chemotherapy regimens for ovarian  
919 carcinosarcoma: a single institution case series and review of the literature. *BMC*  
920 *Cancer* **18**, 172 (2018).
- 921 62. Ebata, T., *et al.* Treatment Outcome of Second-Line Chemotherapy for Gynecologic  
922 Carcinosarcoma. *Oncology*, 1-7 (2020).
- 923 63. Norquist, B.M., *et al.* Inherited Mutations in Women With Ovarian Carcinoma. *JAMA*  
924 *Oncol* **2**, 482-490 (2016).
- 925 64. Balzeau, J., Menezes, M.R., Cao, S. & Hagan, J.P. The LIN28/let-7 Pathway in Cancer.  
926 *Front Genet* **8**, 31 (2017).
- 927 65. Cortes, J., *et al.* Eribulin monotherapy versus treatment of physician's choice in patients  
928 with metastatic breast cancer (EMBRACE): a phase 3 open-label randomised study.  
929 *Lancet* **377**, 914-923 (2011).
- 930 66. Hensley, M.L., *et al.* Eribulin mesylate (halichondrin B analog E7389) in platinum-  
931 resistant and platinum-sensitive ovarian cancer: a 2-cohort, phase 2 study. *Cancer* **118**,  
932 2403-2410 (2012).
- 933 67. Glaser, G., *et al.* Conventional chemotherapy and oncogenic pathway targeting in  
934 ovarian carcinosarcoma using a patient-derived tumorgraft. *PLoS One* **10**, e0126867  
935 (2015).
- 936 68. Mullen, P.J., Yu, R., Longo, J., Archer, M.C. & Penn, L.Z. The interplay between cell  
937 signalling and the mevalonate pathway in cancer. *Nat Rev Cancer* **16**, 718-731 (2016).
- 938 69. Morandi, A., Taddei, M.L., Chiarugi, P. & Giannoni, E. Targeting the Metabolic  
939 Reprogramming That Controls Epithelial-to-Mesenchymal Transition in Aggressive  
940 Tumors. *Front Oncol* **7**, 40 (2017).
- 941 70. Sciacovelli, M. & Frezza, C. Metabolic reprogramming and epithelial-to-mesenchymal  
942 transition in cancer. *Febs j* **284**, 3132-3144 (2017).
- 943 71. Liu, M., *et al.* Transcriptional Profiling Reveals a Common Metabolic Program in  
944 High-Risk Human Neuroblastoma and Mouse Neuroblastoma Sphere-Forming Cells.  
945 *Cell Rep* **17**, 609-623 (2016).
- 946 72. Longo, J., *et al.* An actionable sterol-regulated feedback loop modulates statin  
947 sensitivity in prostate cancer. *Mol Metab* **25**, 119-130 (2019).
- 948 73. Zheng, L., Li, L., Lu, Y., Jiang, F. & Yang, X.A. SREBP2 contributes to cisplatin  
949 resistance in ovarian cancer cells. *Exp Biol Med (Maywood)* **243**, 655-662 (2018).
- 950 74. Pandyra, A.A., *et al.* Genome-wide RNAi analysis reveals that simultaneous inhibition  
951 of specific mevalonate pathway genes potentiates tumor cell death. *Oncotarget* **6**,  
952 26909-26921 (2015).
- 953 75. Novak, A., *et al.* Cholesterol masks membrane glycosphingolipid tumor-associated  
954 antigens to reduce their immunodetection in human cancer biopsies. *Glycobiology* **23**,  
955 1230-1239 (2013).
- 956 76. Goto, W., *et al.* Eribulin Promotes Antitumor Immune Responses in Patients with  
957 Locally Advanced or Metastatic Breast Cancer. *Anticancer Res* **38**, 2929-2938 (2018).
- 958 77. Futreal, P.A., *et al.* A census of human cancer genes. *Nat Rev Cancer* **4**, 177-183  
959 (2004).
- 960 78. Ainscough, B.J., *et al.* DoCM: a database of curated mutations in cancer. *Nat Methods*  
961 **13**, 806-807 (2016).
- 962 79. Vogelstein, B., *et al.* Cancer genome landscapes. *Science* **339**, 1546-1558 (2013).

- 963 80. Kandoth, C., *et al.* Mutational landscape and significance across 12 major cancer types.  
964 *Nature* **502**, 333-339 (2013).
- 965 81. Lawrence, M. & Morgan, M. Scalable Genomics with R and Bioconductor. *Stat Sci* **29**,  
966 214-226 (2014).
- 967 82. Tamborero, D., Gonzalez-Perez, A. & Lopez-Bigas, N. OncodriveCLUST: exploiting  
968 the positional clustering of somatic mutations to identify cancer genes. *Bioinformatics*  
969 **29**, 2238-2244 (2013).
- 970 83. Zack, T.I., *et al.* Pan-cancer patterns of somatic copy number alteration. *Nat Genet* **45**,  
971 1134-1140 (2013).
- 972 84. Koster, J. & Rahmann, S. Snakemake--a scalable bioinformatics workflow engine.  
973 *Bioinformatics* **28**, 2520-2522 (2012).
- 974 85. Li, H. Aligning sequence reads, clone sequences and assembly contigs with BWA-  
975 MEM. (2013).
- 976 86. Tischler, G. & Leonard, S. biobambam: tools for read pair collation based algorithms  
977 on BAM files. *Source Code for Biology and Medicine* **9**, 13 (2014).
- 978 87. Li, H., *et al.* The Sequence Alignment/Map format and SAMtools. *Bioinformatics* **25**,  
979 2078-2079 (2009).
- 980 88. Gerstung, M., Papaemmanuil, E. & Campbell, P.J. Subclonal variant calling with  
981 multiple samples and prior knowledge. *Bioinformatics* **30**, 1198-1204 (2014).
- 982 89. Gerstung, M., *et al.* Reliable detection of subclonal single-nucleotide variants in tumour  
983 cell populations. *Nat Commun* **3**, 811 (2012).
- 984 90. Ye, K., Schulz, M.H., Long, Q., Apweiler, R. & Ning, Z. Pindel: a pattern growth  
985 approach to detect break points of large deletions and medium sized insertions from  
986 paired-end short reads. *Bioinformatics* **25**, 2865-2871 (2009).
- 987 91. Munz, M., *et al.* CSN and CAVA: variant annotation tools for rapid, robust next-  
988 generation sequencing analysis in the clinical setting. *Genome Med* **7**, 76 (2015).
- 989 92. Cooke, S.L., *et al.* The driver mutational landscape of ovarian squamous cell  
990 carcinomas arising in mature cystic teratoma. *Clin Cancer Res* **34**, 7633-7640 (2017).
- 991 93. Love, M.I., Huber, W. & Anders, S. Moderated estimation of fold change and  
992 dispersion for RNA-seq data with DESeq2. *Genome Biol* **15**, 550 (2014).
- 993 94. Patro, R., Duggal, G., Love, M.I., Irizarry, R.A. & Kingsford, C. Salmon provides fast  
994 and bias-aware quantification of transcript expression. *Nat Methods* **14**, 417-419  
995 (2017).
- 996 95. Flicek, P., *et al.* Ensembl 2014. *Nucleic Acids Res* **42**, D749-755 (2014).
- 997 96. Foroutan, M., *et al.* Single sample scoring of molecular phenotypes. *BMC*  
998 *Bioinformatics* **19**, 404 (2018).
- 999 97. Aitchison, J. The Statistical Analysis of Compositional Data. *Journal of the Royal*  
1000 *Statistical Society: Series B (Methodological)* **44**, 139-160 (1982).
- 1001 98. Bray, N.L., Pimentel, H., Melsted, P. & Pachter, L. Near-optimal probabilistic RNA-  
1002 seq quantification. *Nat Biotechnol* **34**, 525-527 (2016).
- 1003 99. Harrison, P.F., Pattison, A.D., Powell, D.R. & Beilharz, T.H. Topconfects: a package  
1004 for confident effect sizes in differential expression analysis provides a more  
1005 biologically useful ranked gene list. *Genome Biol* **20**, 67 (2019).
- 1006 100. Schindelin, J., *et al.* Fiji: an open-source platform for biological-image analysis. *Nat*  
1007 *Methods* **9**, 676-682 (2012).
- 1008 101. Wakefield, M.J. Survival volume: interactive volume threshold survival graphs. *The*  
1009 *Journal of Open Source Software* **1(8)**, 111 (2016).
- 1010 102. Barker, H.E., *et al.* LOXL2-mediated matrix remodeling in metastasis and mammary  
1011 gland involution. *Cancer Res* **71**, 1561-1572 (2011).
- 1012

1013 **Main Tables and Figures**

1014

1015 **Table 1: *In vivo* responses of GEMM tumours to cisplatin, paclitaxel, pegylated liposomal**  
 1016 **doxorubicin (PLD), vinorelbine and eribulin**

| Treatment   | Number of mice (n) | Time to progressive disease (PD) (days) | Median time to harvest (TTH) (days) | p value Compared to vehicle | p value Compared to cisplatin | p value Compared to eribulin | p value Compared to paclitaxel | p value Compared to doxorubicin liposomal | p value Compared to vinorelbine | Drug response score |
|-------------|--------------------|-----------------------------------------|-------------------------------------|-----------------------------|-------------------------------|------------------------------|--------------------------------|-------------------------------------------|---------------------------------|---------------------|
| Vehicle     | 25                 | 7                                       | 15                                  |                             |                               |                              |                                |                                           |                                 |                     |
| Cisplatin   | 10                 | 7                                       | 18                                  | 0.0251                      |                               | 0.2063                       | 0.9378                         |                                           | <0.0001                         | Refractory          |
| Paclitaxel  | 3                  | 7                                       | 36                                  | 0.0101                      | 0.9378                        | 0.0067                       |                                | 0.4855                                    | 0.0006                          | Refractory          |
| PLD         | 3                  | 7                                       | 29                                  | 0.0798                      | 0.5834                        | 0.0043                       | 0.4855                         |                                           | 0.0002                          | Refractory          |
| Vinorelbine | 9                  | 56                                      | 81                                  | <0.0001                     | <0.0001                       | 0.0012                       | 0.0006                         | 0.0002                                    |                                 | Responsive          |
| Eribulin    | 5                  | 35                                      | 46                                  | <0.0001                     | 0.2063                        |                              | 0.0067                         | 0.0043                                    | 0.0012                          | Responsive          |

1017

1018 The GEMM tumours were refractory to cisplatin, paclitaxel and PLD as the time to progressive  
 1019 disease (PD) was the same as for vehicle treated mice. PLD and cisplatin failed to demonstrate  
 1020 any meaningful response with no significant difference in median time-to-harvest (TTH)  
 1021 compared to vehicle treatment. Paclitaxel demonstrated modest responses with an increase in  
 1022 median TTH from 15 to 36 days compared to vehicle treated mice ( $p = 0.0101$ ). Improvement  
 1023 in time to PD were seen in tumours treated with vinorelbine (56 days) and eribulin (35 days).  
 1024 This led to a significant improvement of median TTH from 15 days for vehicle treated mice to  
 1025 81 days with vinorelbine ( $p < 0.0001$ ) and to 46 days with eribulin ( $p < 0.0001$ ). The log-rank  
 1026 test was used for statistical analysis of Kaplan-Meier survival curves (Figure 3a).

1027

1028

1029

1030

1031

1032

1033

1034

1035

1036

1037

1038

1039

1040 **Table 2: *In vivo* responses of OCS PDXs to cisplatin, paclitaxel, vinorelbine and eribulin**

| PDX model | Treatment   | Number of mice (n) | Time to progressive disease (PD) (days) | Median time to harvest (TTH) (days) | p value Compared to vehicle | p value Compared to cisplatin | p value Compared to eribulin | p value Compared to paclitaxel | p value Compared to vinorelbine | Drug response score (Topp et al) |
|-----------|-------------|--------------------|-----------------------------------------|-------------------------------------|-----------------------------|-------------------------------|------------------------------|--------------------------------|---------------------------------|----------------------------------|
| SFRC01040 | Vehicle     | 8                  | 7                                       | 53                                  |                             |                               |                              |                                |                                 |                                  |
|           | Cisplatin   | 8                  | 60                                      | 120                                 | 0.0008                      |                               |                              |                                |                                 | Resistant                        |
|           | Eribulin    | 7                  | >120                                    | >120                                | 0.0015                      | 0.0511                        |                              | >0.9999                        | >0.9999                         | Sensitive                        |
|           | Paclitaxel  | 7                  | >120                                    | >120                                | 0.0013                      | 0.0511                        | >0.9999                      |                                | >0.9999                         | Sensitive                        |
|           | Vinorelbine | 6                  | >120                                    | >120                                | 0.0033                      | 0.1232                        | >0.9999                      | >0.9999                        |                                 | Sensitive                        |
| PH419     | Vehicle     | 23                 | 7                                       | 15                                  |                             |                               |                              |                                |                                 |                                  |
|           | Cisplatin   | 13                 | 7                                       | 39                                  | <0.0001                     |                               |                              |                                |                                 | Refractory                       |
|           | Eribulin    | 8                  | >120                                    | >120                                | <0.0001                     | 0.0016                        |                              | 0.0875                         | 0.0446                          | Sensitive                        |
|           | Paclitaxel  | 14                 | 112                                     | 120                                 | <0.0001                     | 0.0036                        | 0.0875                       |                                | 0.6489                          | Sensitive                        |
|           | Vinorelbine | 12                 | 80                                      | 99                                  | <0.0001                     | 0.0151                        | 0.0446                       | 0.6489                         |                                 | Resistant                        |
| PH142     | Vehicle     | 31                 | 7                                       | 15                                  |                             |                               |                              |                                |                                 |                                  |
|           | Cisplatin   | 19                 | 42                                      | 71                                  | <0.0001                     |                               |                              |                                |                                 | Resistant                        |
|           | Eribulin    | 10                 | 77                                      | 99                                  | <0.0001                     | 0.0042                        |                              | 0.8113                         | 0.4092                          | Resistant                        |
|           | Paclitaxel  | 22                 | 57                                      | 95                                  | <0.0001                     | <0.0001                       | 0.8113                       |                                | 0.1134                          | Resistant                        |
|           | Vinorelbine | 19                 | 120                                     | 106                                 | <0.0001                     | <0.0001                       | 0.4092                       | 0.1134                         |                                 | Sensitive                        |
| PH006     | Vehicle     | 17                 | 7                                       | 22                                  |                             |                               |                              |                                |                                 |                                  |
|           | Cisplatin   | 9                  | 7                                       | 39                                  | 0.0064                      |                               |                              |                                |                                 | Refractory                       |
|           | Eribulin    | 6                  | >120                                    | >120                                | 0.0005                      | 0.0079                        |                              | 0.4795                         | >0.9999                         | Sensitive                        |
|           | Paclitaxel  | 7                  | >120                                    | >120                                | <0.0001                     | 0.0024                        | 0.4795                       |                                | 0.3173                          | Sensitive                        |
|           | Vinorelbine | 7                  | >120                                    | >120                                | <0.0001                     | 0.0012                        | >0.9999                      | 0.3173                         |                                 | Sensitive                        |
| PH003     | Vehicle     | 23                 | 7                                       | 8                                   |                             |                               |                              |                                |                                 |                                  |
|           | Cisplatin   | 19                 | 7                                       | 15                                  | 0.0005                      |                               |                              |                                |                                 | Refractory                       |
|           | Eribulin    | 14                 | 7                                       | 25                                  | 0.0003                      | 0.0044                        |                              | 0.9612                         | 0.1339                          | Refractory                       |
|           | Paclitaxel  | 16                 | 7                                       | 29                                  | <0.0001                     | 0.0025                        | 0.9612                       |                                | 0.0666                          | Refractory                       |
|           | Vinorelbine | 13                 | 18                                      | 32                                  | <0.0001                     | 0.0005                        | 0.1339                       | 0.0666                         |                                 | Refractory                       |
| PH592     | Vehicle     | 18                 | 7                                       | 15                                  |                             |                               |                              |                                |                                 |                                  |
|           | Cisplatin   | 7                  | 7                                       | 15                                  | 0.0335                      |                               |                              |                                |                                 | Refractory                       |
|           | Eribulin    | 8                  | 80                                      | 92                                  | <0.0001                     | <0.0001                       |                              | 0.2838                         | 0.3070                          | Resistant                        |
|           | Paclitaxel  | 8                  | 88                                      | 102                                 | <0.0001                     | <0.0001                       | 0.2838                       |                                | 0.2183                          | Resistant                        |
|           | Vinorelbine | 9                  | 63                                      | 71                                  | <0.0001                     | <0.0001                       | 0.3070                       | 0.2183                         |                                 | Resistant                        |

1041

1042 Cisplatin failed to achieve any meaningful tumour response in four of six PDX models; PH419,

1043 PH006, PH003 and PH592, with a time to development of progressive disease (PD) during

1044 cisplatin treatment. PH142 and SFRC01040 demonstrated some response to cisplatin with

1045 improvement of median TTH from 15 to 71 days ( $p < 0.0001$ ) and 53 to 120 days ( $p = 0.0008$ ),  
1046 compared to vehicle treated mice, respectively. However, times to PD were less than 100 days  
1047 (PH142 at 42 days and SRFC01040 at 60 days), therefore these tumours were classified as  
1048 resistant to cisplatin. Three of six PDX (SFRC01040, PH419 and PH006) were shown to be  
1049 sensitive to paclitaxel *in vivo*, two PDX (PH142 and PH592) were resistant and one PDX  
1050 (PH003) was refractory based on the same *in vivo* drug response score as cisplatin. Paclitaxel  
1051 treated PDX models displayed an impressive improvement in median TTH compared with  
1052 vehicle treated mice except for PH003 (53 to >120 days for SFRC01040 ( $p = 0.0013$ ), 15 to  
1053 120 days for PH419 ( $p < 0.0001$ ), 15 to 95 days for PH142 ( $p < 0.0001$ ), 22 to >120 days for  
1054 PH006 ( $p < 0.0001$ ), and 15 to 102 days for PH592 ( $p < 0.0001$ )). Significant improvements in  
1055 median TTH compared to cisplatin treated mice were observed for four models (39 to 120 days  
1056 for PH419 ( $p = 0.0036$ ), 71 to 95 days for PH142 ( $p < 0.0001$ ), 39 to >120 days for PH006 ( $p$   
1057 = 0.0024), and 15 to 102 days for PH592 ( $p < 0.0001$ )). Three of six OCS PDX (SFRC01040,  
1058 PH142 and PH006) were sensitive, two PDXs (PH419 and PH592) were resistant and one PDX  
1059 (PH003) was refractory to vinorelbine treatment. Significant improvements of median TTH  
1060 compared with vehicle treated mice were observed for all models treated with vinorelbine  
1061 except for PH003 (53 to >120 days for SFRC01040 ( $p = 0.0033$ ), 15 to 99 days for PH419 ( $p$   
1062 < 0.0001), 15 to 106 days for PH142 ( $p < 0.0001$ ), 22 to >120 days for PH006 ( $p < 0.0001$ ),  
1063 and 15 to 71 days for PH592 ( $p < 0.0001$ )). There were significant improvements in median  
1064 TTH compared with cisplatin treated mice were also observed for four models (120 to >120  
1065 days for SFRC01040 ( $p = 0.1232$ ), 39 to 99 days for PH419 ( $p = 0.0151$ ), 71 to 106 days for  
1066 PH142 ( $p < 0.0001$ ), 39 to >120 days for PH006 ( $p = 0.0012$ ), and 15 to 71 days for PH592 ( $p$   
1067 < 0.0001)). Three of six OCS PDX models (SFRC01040, PH419 and PH006) were sensitive,  
1068 two PDX (PH412 and PH592) were resistant and one PDX (PH003) was refractory to eribulin  
1069 treatment. Significant improvements of median TTH were observed in eribulin treated mice  
1070 compared to vehicle for five models (53 to >120 days for SFRC01040 ( $p = 0.0015$ ), 15 to 99  
1071 days for PH142 ( $p < 0.0001$ ), 22 to >120 days for PH006 ( $p = 0.0005$ ), 15 to >120 days for  
1072 PH419 ( $p < 0.0001$ ), and 15 to 92 days for PH592 ( $p = <0.0001$ )). Lastly, significant  
1073 improvements in median TTH compared with cisplatin treated mice were also observed for  
1074 four models (120 to >120 days for SFRC01040 ( $p = 0.0511$ ), 39 to >120 days for PH419 ( $p =$   
1075 0.0016), 71 to 99 days for PH142 ( $p = 0.0042$ ), 39 to >120 days for PH006 ( $p = 0.0079$ ), 15 to  
1076 25 days for PH003 ( $p = 0.0044$ ), and 15 to 92 days for PH592 ( $p < 0.0001$ )). The log-rank test  
1077 was used for statistical analysis of Kaplan-Meier survival curves (Figure 5a).  
1078





1091

## Figure 2

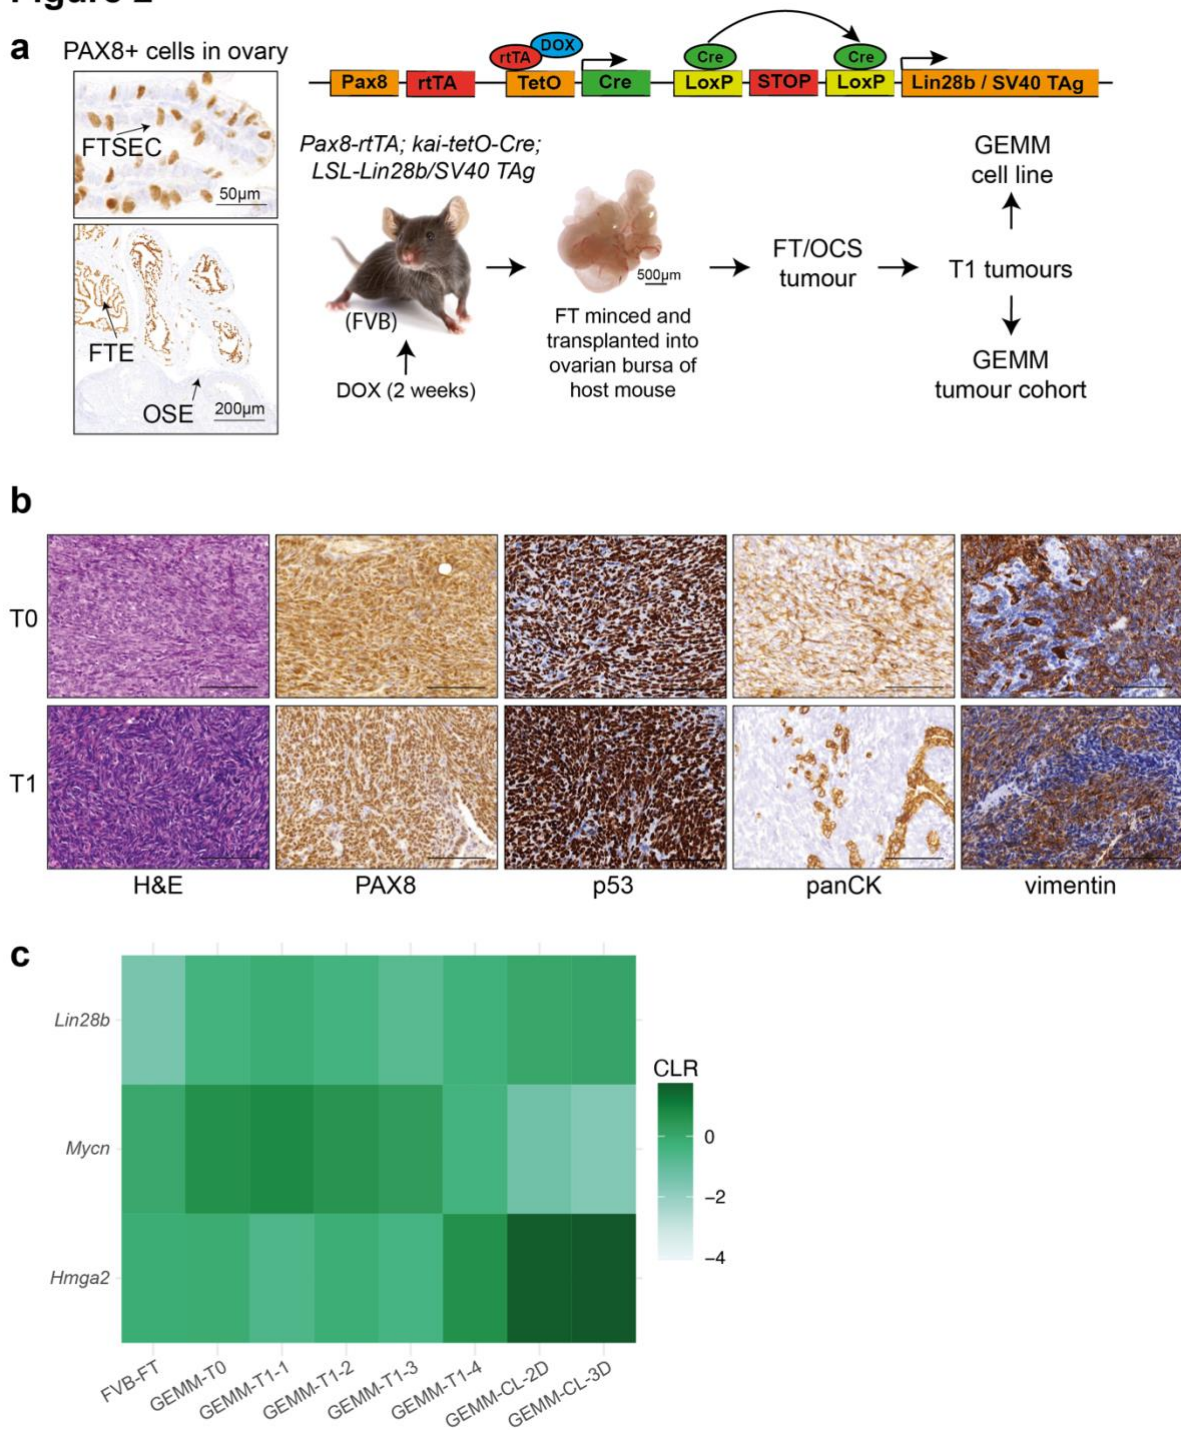

1092

1093 **Figure 2: Generation and characterisation of a GEMM of OCS.** (A) A *Pax8-rtTA; kai-*  
 1094 *tetO-Cre; LSL-Lin28b/SV40TAG* transgenic mouse was treated with doxycycline for 2 weeks  
 1095 to induce expression of Cre recombinase in the FTSECs. The FTs were then removed, minced  
 1096 and transplanted into the ovarian bursa of a *cba/Nu* host mouse, generating the GEMM founder  
 1097 tumour (T0). This tumour was transplanted into mice to establish the first and subsequent OCS  
 1098 cohorts (T1, T2, T3, etc). A T1 tumour was also digested and cultured *in vitro* to generate a

1099 cell line. **(B)** The GEMM T0 founder tumour and a tumour generated after the 1<sup>st</sup> transplant  
1100 (T1) were assessed by IHC. T0 and T1 tumours expressed PAX8, indicating FTSEC derivation.  
1101 Representative images of H&E, PAX8, p53, Pan-CK and Vimentin staining are shown. Scale  
1102 bars represent 100µm. **(C)** The GEMM T0 founder tumour, T1 tumours (n=4) and the GEMM  
1103 cell line grown in 2D and 3D were analysed by RNA-seq. Controls included normal FT tissue  
1104 harvested from FVB mice, and FT epithelial cells and stroma. A heatmap shows the expression  
1105 of genes involved in the N-MYC/LIN28B pathway: *Lin28b*, *Mycn* and *Hmga2*. GEMM,  
1106 genetically engineered mouse model; FTSEC, fallopian tube secretory epithelial cell; FTE,  
1107 fallopian tube epithelium; OSE, ovarian surface epithelium; CK, cytokeratin; FT, fallopian  
1108 tube; CLR, centred log ratio.

### Figure 3

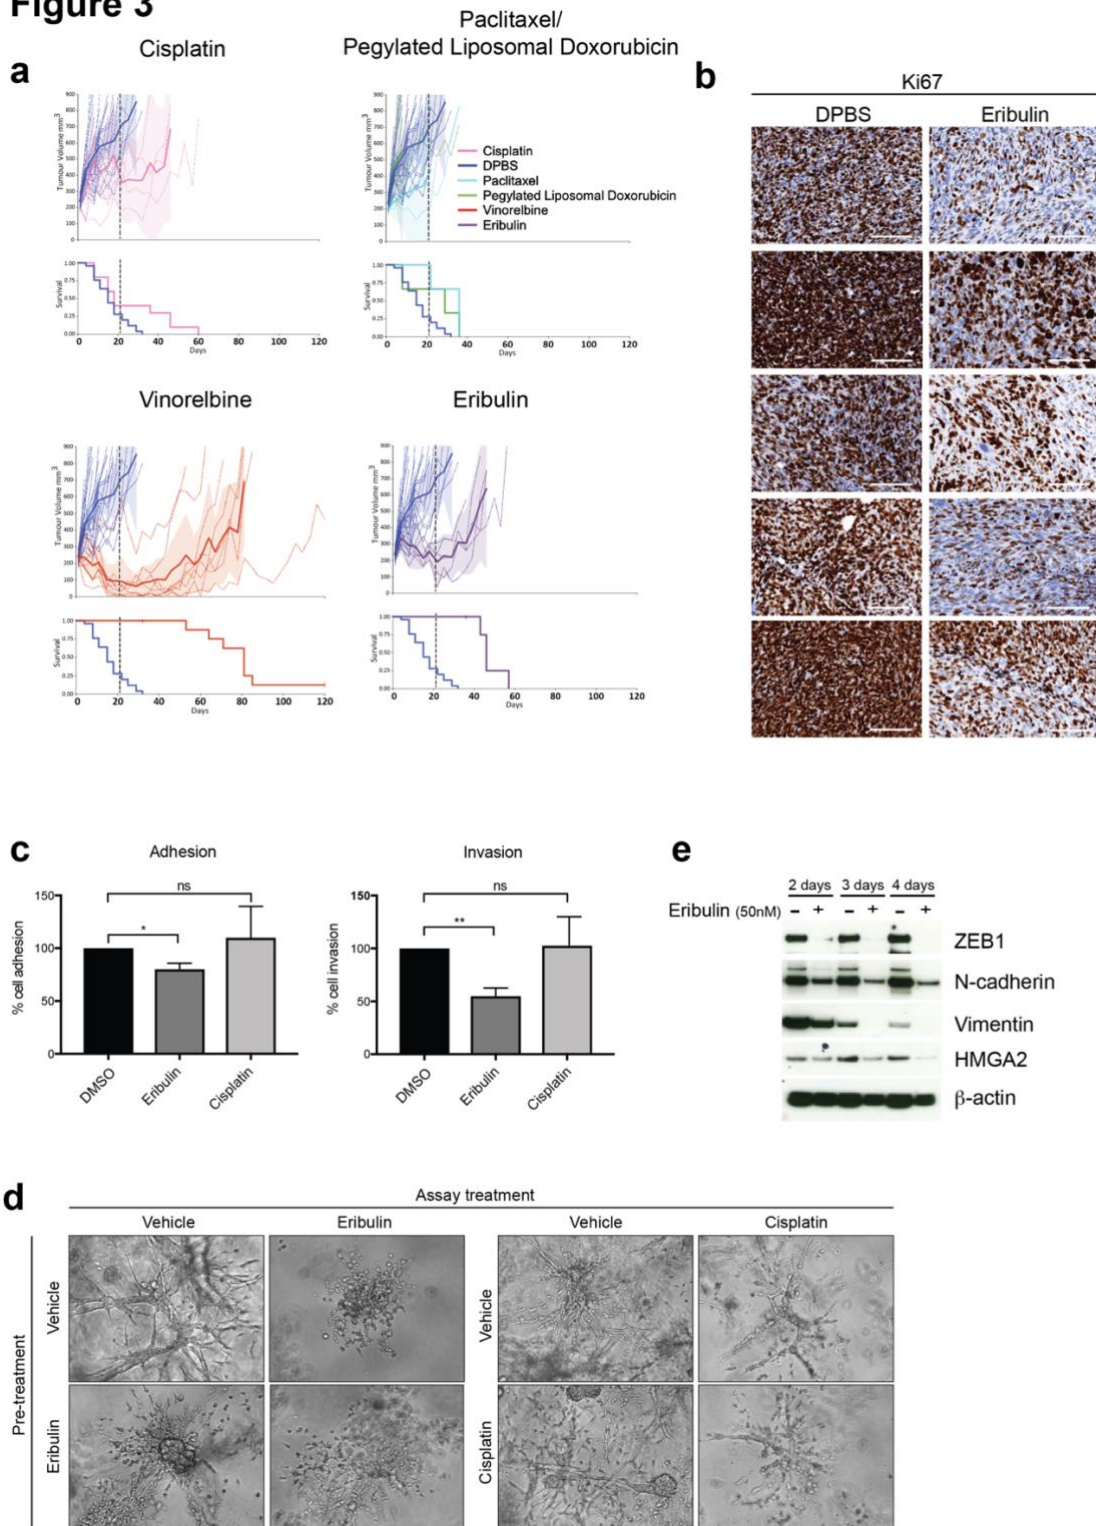

1109

1110 **Figure 3: GEMM OCS tumours are refractory to current standard-of-care treatments**  
 1111 **for ovarian cancer but are responsive to the microtubule drugs vinorelbine and eribulin.**

1112 (A) *In vivo* treatment of GEMM OCS tumours with: DPBS (n=25), cisplatin (4mg/kg; n=10),  
 1113 PLD (1.5mg/kg; n=3), paclitaxel (n=3), vinorelbine (15mg/kg; n = 9) and eribulin (1.5mg/kg;  
 1114 n=5). Shaded area = 95% confidence interval. Time to PD and harvest (TTH) are shown in

1115 Table 1. **(B)** Expression of Ki67 was assessed by IHC in a number of tumours after a single  
1116 dose of eribulin (or DPBS vehicle). Representative images are shown. Scale bars represent  
1117 100 $\mu$ m. **(C)** GEMM cells were pre-treated with eribulin (20 nM), cisplatin (0.2  $\mu$ M) or vehicle  
1118 control (DMSO) for one week before being plated in adhesion assays (left panel) or migration  
1119 and invasion assays (right panel). Percentage of adherent cells was calculated compared to  
1120 vehicle-treated controls. Percentage of invading cells was calculated compared to number of  
1121 migrating cells. **(D)** GEMM cells were pre-treated as above with eribulin, cisplatin or vehicle  
1122 control (DMSO) for one week before being plated in collagen with treatment either removed  
1123 or maintained. Representative images of colonies growing in collagen on day 8 are shown.  
1124 Scale bars represent 200 $\mu$ m. **(E)** Expression of the mesenchymal markers ZEB1, N-cadherin,  
1125 Vimentin and HMGA2 in cells exposed to 50nM eribulin or DMSO control for the indicated  
1126 time-points was determined by Western Blot analysis.  $\beta$ -actin was used as a loading control.  
1127 PLD, pegylated liposomal doxorubicin; PD, progressive disease; IHC, immunohistochemistry.  
1128  
1129  
1130



## Figure 4

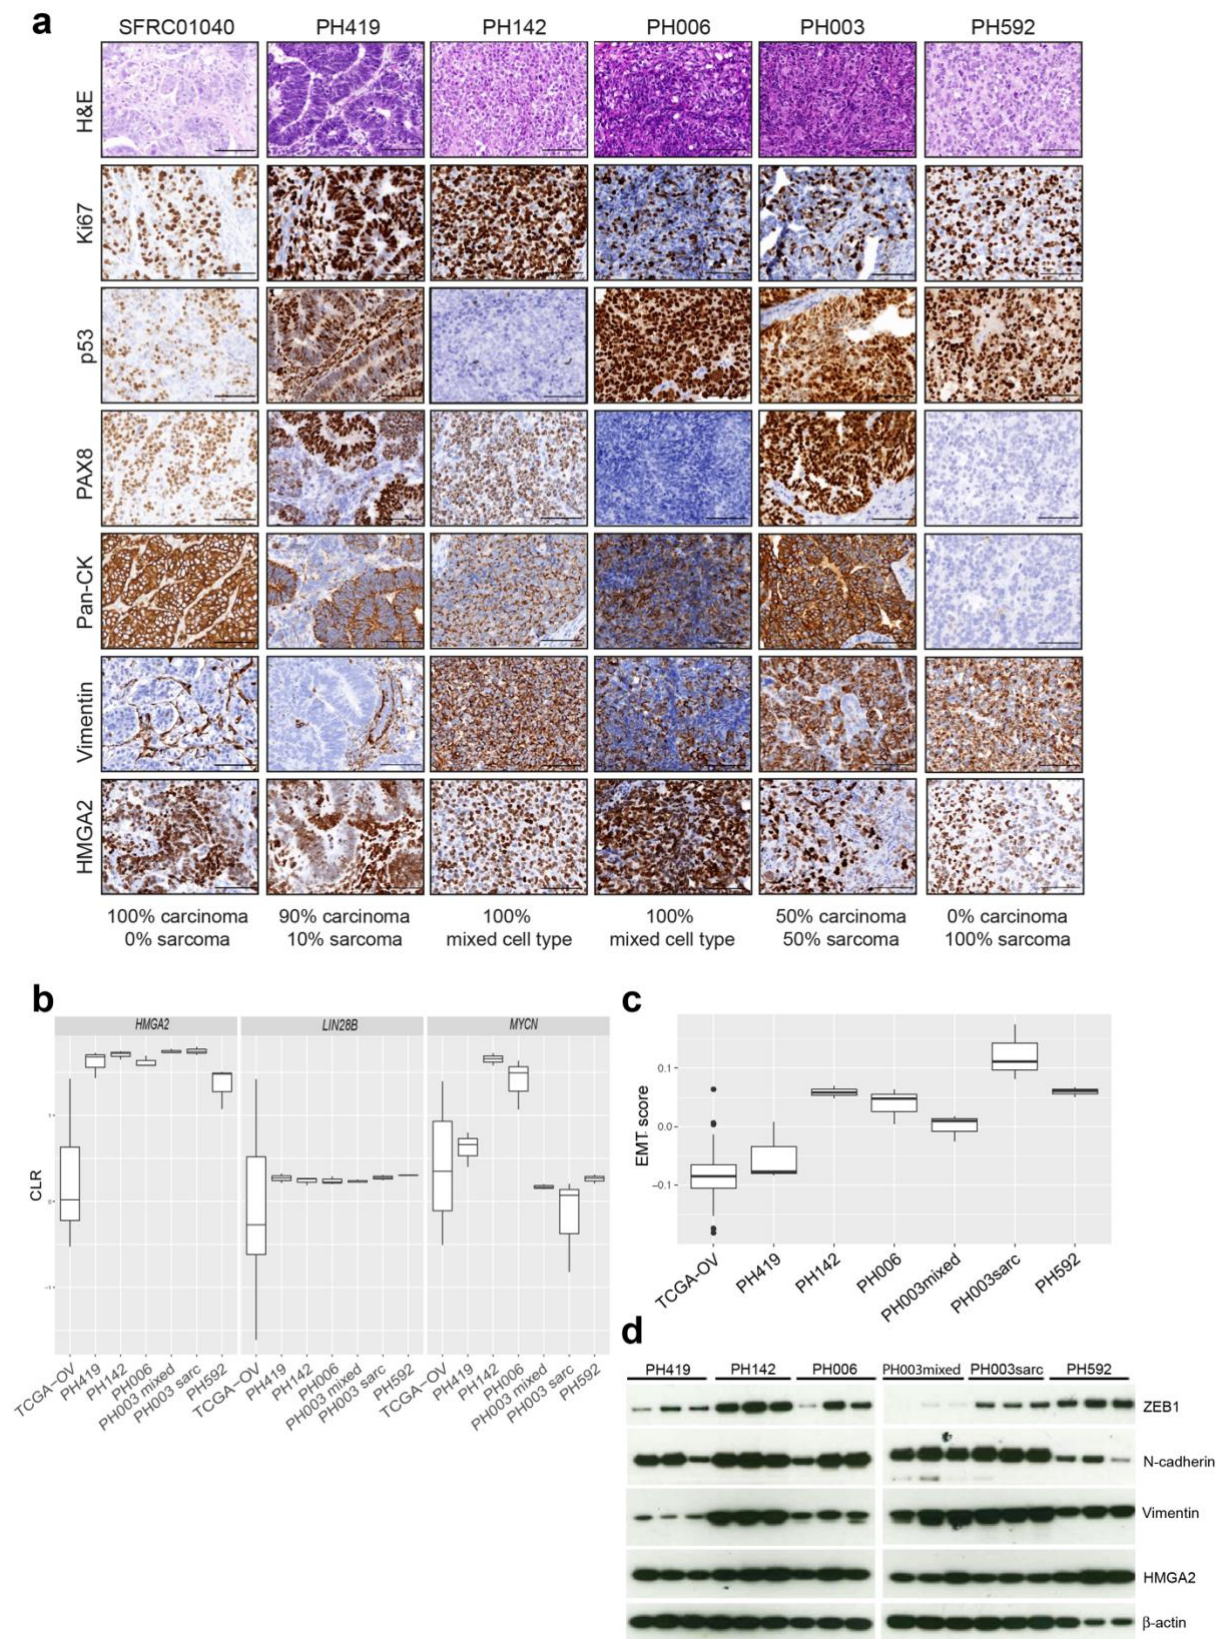

1131

1132

1133 **Figure 4: Characterisation of PDX models of OCS with varying proportions of carcinoma**  
1134 **and sarcoma** (A) Tumours from each PDX model of OCS were assessed by IHC.  
1135 Representative images of H&E, Ki67, p53, PAX8, Pan-CK, Vimentin and HMGA2 staining  
1136 are shown. Scale bars represent 100µm. SFRC01040 and PH419 were almost purely  
1137 carcinoma, PH142, PH006 and PH003 were mixed with both carcinomatous and sarcomatous  
1138 characteristics (i.e. expressing both Pan-CK and Vimentin) and PH592 was purely  
1139 sarcomatous, with some epithelial characteristics (i.e. Pan-CK co-expression in some cells).  
1140 (B) Expression of *HMGA2*, *LIN28B* and *MYCN* were determined from RNAseq data for each  
1141 OCS model (n = 3) compared to ovarian high-grade serous carcinoma samples in TCGA (n =  
1142 379). (C) EMT scores generated from RNAseq data for tumours from each OCS PDX model  
1143 are shown compared with EMT scores for ovarian high-grade serous carcinoma samples in  
1144 TCGA. (D) Expression of the mesenchymal markers ZEB1, N-cadherin, Vimentin and  
1145 HMGA2 in tumours from each OCS PDX model was determined by Western Blot analysis.  $\beta$ -  
1146 actin was used as a loading control. PDX, patient-derived xenograft; IHC,  
1147 immunohistochemistry; CK, cytokeratin; TCGA-OV, ovarian high-grade serous carcinomas in  
1148 TCGA; EMT, epithelial-to-mesenchymal transition; CLR, centred log ratio.



**Figure 5**

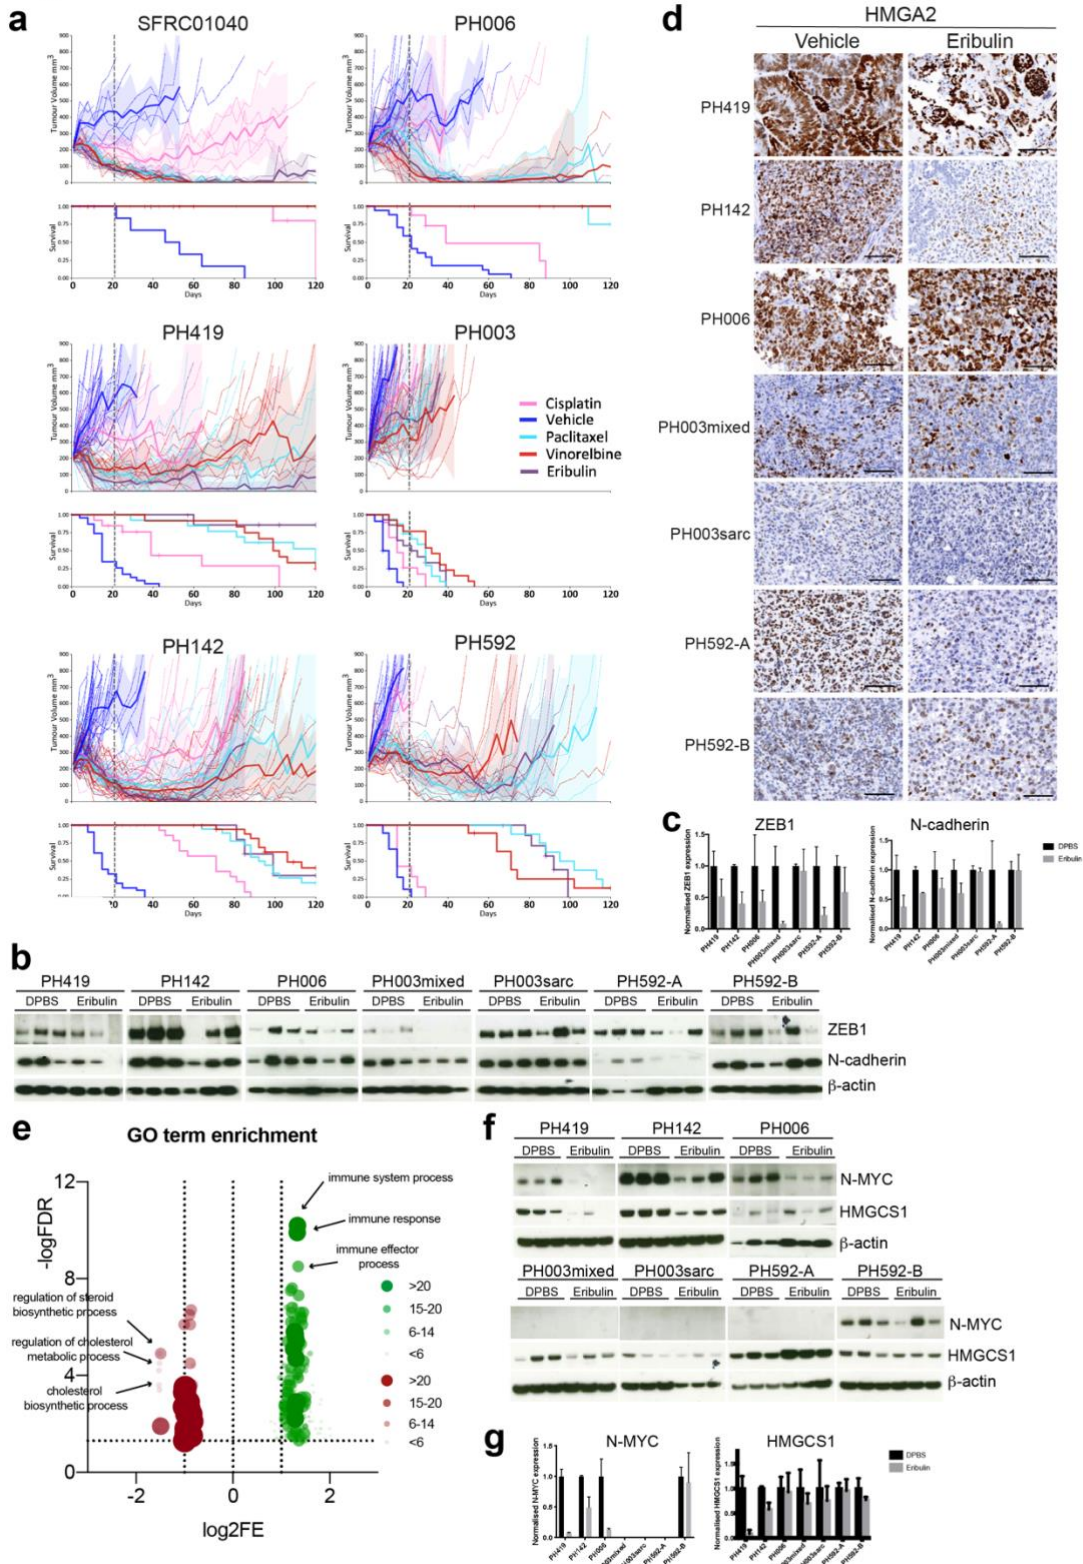

1149

1150

1151 **Figure 5: PDX OCS tumours are refractory to cisplatin but display mostly impressive**  
1152 **responses to microtubule drugs. (A)** *In vivo* treatment of OCS PDX tumours with DPBS,  
1153 cisplatin (4mg/kg), paclitaxel (25mg/kg), vinorelbine (15mg/kg) and eribulin (1.5mg/kg, with  
1154 the exception of mice harbouring SFRC01040 tumours, which received doses of 1mg/kg). n  
1155 values for each model are shown in Table 2. Shaded area = 95% confidence interval. More  
1156 carcinomatous models are shown on the top left and the more sarcomatous models on the  
1157 bottom right. Time to PD and harvest (TTH) are shown in Table 2. **(B)** Expression of the  
1158 mesenchymal markers ZEB1 and N-cadherin in tumours from each OCS PDX model after a  
1159 single dose of vehicle (DPBS) or eribulin was determined by Western Blot analysis.  $\beta$ -actin  
1160 was used as a loading control. **(C)** Quantification of expression data in (B). **(D)** Expression of  
1161 HMGA2 in tumours from each OCS PDX model after a single dose of vehicle (DPBS) or  
1162 eribulin was determined by IHC. Scale bars represent 100 $\mu$ m. **(E)** Analysis of GO terms  
1163 enriched for down-regulated (red) and up-regulated (green) DEGs. Circle sizes indicate DEGs  
1164 present in each GO term. DEGs are listed in Supplementary Tables S18 - S21. **(F)** Expression  
1165 of N-MYC and HMGCS1 in tumours from each OCS PDX model after a single dose of vehicle  
1166 (DPBS) or eribulin was determined by Western Blot analysis.  $\beta$ -actin was used as a loading  
1167 control. **(G)** Quantification of expression data in (F). GO, gene ontology; DEG, differentially  
1168 expressed gene; FDR, false discovery rate.  
1169
